# Supplementary material
Source: PubMed Central journal article supplement (PMC3825087)
Supplement: es403635j_si_001.pdf [file es403635j_si_001.pdf]

1 Effects of consumptive water use on biodiversity  
2 in wetlands of international importance

3 Francesca Verones<sup>\*#</sup>, Dominik Saner<sup>#</sup>, Stephan Pfister<sup>#</sup>, Daniele Baisero<sup>§</sup>, Carlo Rondinini<sup>§</sup>,  
4 Stefanie Hellweg<sup>#</sup>

5 <sup>#</sup>ETH Zurich, Institute of Environmental Engineering, 8093 Zurich, Switzerland

6 <sup>§</sup>Global Mammal Assessment program, Department of Biology and Biotechnologies,  
7 Sapienza, Università di Roma, 00185 Rome, Italy

8 \*Corresponding author e-mail: [francesca.verones@ifu.baug.ethz.ch](mailto:francesca.verones@ifu.baug.ethz.ch)

9 phone: +41-44-633-69-69, fax:+41-44-633-10-61

10  
11 30 pages

12 41 figures

13 12 tables

14  
15  
16  
17 Environmental Science and Technology

18 15 August 2013

29 **Table of Contents**

30 S1. Inland Ramsar wetlands ..... 3

31 S2. Overview of species and data sources ..... 3

32 S3. Bird maps ..... 4

33 S4. Reptile maps ..... 7

34 S5. Amphibian maps ..... 9

35 S6. Mammal maps ..... 10

36 S7. CpA – Waterbody count per area ..... 11

37 S8. Species-area relationship and z-values ..... 12

38 S9. Characterization factors – determining individual catchments ..... 13

39 S10. EFs and CFs ..... 14

40 S11. Sensitivities and correlations of EF and CF ..... 20

41 S12. Example of comparison of CFs calculated with PDFs and species-eq. .... 29

42 S13. Agricultural water requirement ratio ..... 29

43 S14. References ..... 29

44

45

46

47

48

49

50

51

52

53

54

55

56

57

58

59

60 **S1. Inland Ramsar wetlands**

61 According to the Ramsar convention, wetlands are defined as “areas of marsh, fen, peatland or water,  
 62 whether natural or artificial, permanent or temporary, with water that is static or flowing, fresh,  
 63 brackish or salt, including areas of marine water the depth of which at low tide does not exceed six  
 64 metres”.<sup>1</sup> The biological importance of the Ramsar sites, as indicated in the Ramsar Sites  
 65 Information Service (RIS)<sup>2</sup>, is shown in Table S1 and Table S2. Note that each Ramsar site can be  
 66 named several times within the biological importance category.

67 **Table S1: Biological importance of the Ramsar sites. The number of sites is given for total sites, surface water-fed sites**  
 68 **and groundwater-fed sites. The percentages are related to the respective total (i.e. 1184 for total, 1033 for surface**  
 69 **water-fed and 151 for groundwater-fed wetlands).**

| importance for                    | Total              |                | Surface water-fed  |                | Groundwater-fed    |                |
|-----------------------------------|--------------------|----------------|--------------------|----------------|--------------------|----------------|
|                                   | Number of sites[-] | Percentage [%] | Number of sites[-] | Percentage [%] | Number of sites[-] | Percentage [%] |
| amphibians                        | 300                | 25             | 261                | 25             | 39                 | 26             |
| birds                             | 795                | 67             | 703                | 68             | 92                 | 61             |
| critical link in major food chain | 106                | 9              | 97                 | 9              | 9                  | 6              |
| crocodilians                      | 77                 | 7              | 76                 | 7              | 1                  | 1              |
| fish                              | 489                | 41             | 447                | 43             | 42                 | 28             |
| flora                             | 809                | 68             | 720                | 70             | 89                 | 59             |
| invertebrates                     | 331                | 28             | 289                | 28             | 42                 | 28             |
| mammals                           | 579                | 49             | 513                | 50             | 66                 | 44             |
| marine turtles                    | 11                 | 1              | 11                 | 1              | 0                  | 0              |
| reptiles                          | 304                | 26             | 259                | 25             | 45                 | 30             |
| waterbirds                        | 862                | 73             | 762                | 74             | 100                | 66             |

70

71 **Table S2: Biological importance of the Ramsar sites per geographical region.**

| importance for                    | Africa | Asia | Central America | Europe | Near-East | North America | South America | Oceania |
|-----------------------------------|--------|------|-----------------|--------|-----------|---------------|---------------|---------|
| amphibians                        | 42     | 28   | 31              | 154    | 1         | 15            | 21            | 8       |
| birds                             | 153    | 124  | 56              | 346    | 4         | 28            | 59            | 25      |
| crocodilians                      | 29     | 10   | 12              | 8      | 0         | 1             | 15            | 2       |
| fish                              | 104    | 77   | 45              | 190    | 3         | 24            | 28            | 18      |
| flora                             | 153    | 98   | 52              | 431    | 3         | 7             | 36            | 29      |
| invertebrates                     | 30     | 40   | 11              | 219    | 1         | 13            | 7             | 10      |
| mammals                           | 140    | 73   | 41              | 236    | 1         | 22            | 53            | 13      |
| marine turtles                    | 0      | 2    | 0               | 9      | 0         | 0             | 9             | 0       |
| reptiles                          | 75     | 36   | 40              | 97     | 2         | 16            | 25            | 13      |
| waterbirds                        | 140    | 124  | 44              | 459    | 3         | 24            | 42            | 26      |
| critical link in major food chain | 28     | 22   | 7               | 25     | 0         | 8             | 10            | 6       |

72

73 **S2. Overview of species and data sources**

74 We have included different taxa for calculating effect factors of water consumption on biodiversity in  
 75 wetlands. All species combined can act as a proxy for biodiversity. Table S3 lists all considered taxa.

76 **Table S3: Overview of taxa, data sources and total number of species. The SI section indicates in which section more**  
 77 **information and the calculated maps for the respective taxon can be found.**

| Taxon                   | total Species number | data source                           | SI section | comments                                                                                      |
|-------------------------|----------------------|---------------------------------------|------------|-----------------------------------------------------------------------------------------------|
| Waterbirds              | 2119                 | Birdlife/Nature Serve <sup>3</sup>    | S3         | habitat was according to BirdLife “wetland (inland)” or “artificial landscapes (aquatic)”.    |
| Non-residential birds   | 1274                 | Birdlife/Nature Serve <sup>3</sup>    | S3         | seasonal category "resident" excluded during calculation. Non-residential waterbirds excluded |
| amphibians              | 6021                 | IUCN <sup>4, 5</sup>                  | S5         | all amphibians with map and TL data included                                                  |
| reptiles                | 268                  | IUCN <sup>4, 6</sup>                  | S4         | only reptiles included whose habitat is "wetland (inland)" and contain TL and map data        |
| water-dependent mammals | 123                  | Global Mammal Assessment <sup>7</sup> | S6         | only mammals included that are directly water-dependent (not only for drinking water)         |

78 **S3. Bird maps**

79 For each bird species a shape file is available from BirdLife and NatureServe 2011<sup>3</sup>, indicating the  
 80 range of distribution. Additionally, it gives information on Presence, Origin and Season (see Table S4)  
 81 that is equally valid for amphibians and reptiles.

82 **Table S4: Codes for presence, origin and season of the dataset of BirdLife and NatureServe,<sup>3</sup> that are also valid for**  
 83 **amphibians and reptiles.**

| Presence |                               |                                                                                  |
|----------|-------------------------------|----------------------------------------------------------------------------------|
| Code     | Term                          | Explanation                                                                      |
| 1        | Extant                        | Occurs presently in area                                                         |
| 2        | Probably extant               | Species presence thought probable                                                |
| 3        | Possibly extant               | Species may possibly occur                                                       |
| 4        | Possibly extinct              | Species is most likely extirpated from area                                      |
| 5        | Extinct                       | Formerly occurred in area, not recorded since 30 years, almost certainly extinct |
| 6        | Presence uncertain            | Species formerly there, but now uncertain                                        |
| Origin   |                               |                                                                                  |
| Code     | Term                          | Explanation                                                                      |
| 1        | Native                        | Native inhabitant                                                                |
| 2        | Reintroduced                  | Formerly native range, reintroduced through human activities                     |
| 3        | Introduced                    | Through human activities to areas outside its natural range                      |
| 4        | Vagrant                       | Species recorded once or sporadically, not native to area                        |
| 5        | Origin uncertain              | May be native, reintroduced or introduced                                        |
| Season   |                               |                                                                                  |
| Code     | Term                          | Explanation                                                                      |
| 1        | Resident                      | Present throughout the year                                                      |
| 2        | Breeding season               | Occurs regularly during breeding season                                          |
| 3        | Non-breeding season           | Occurs regularly during non-breeding season, winter                              |
| 4        | Passage                       | Present during short periods during migration                                    |
| 5        | Seasonal occurrence uncertain | Is present but unknown how long/which season                                     |

84

85 Resulting bird maps for the number of non-residential birds and waterbirds and the respective  
 86 vulnerability scores are shown in Figure S1 to Figure S8. For the definition of waterbirds, non-  
 87 residential birds and the calculation of the vulnerability scores, see the main document.

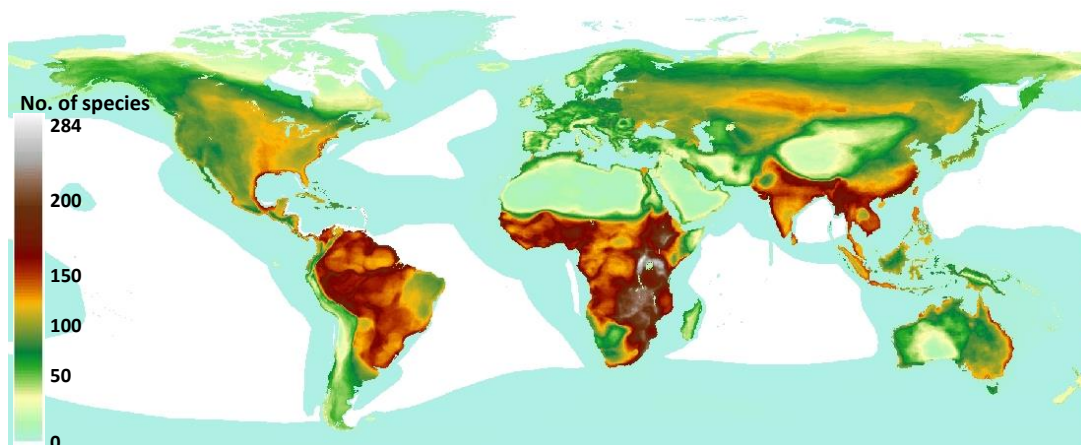

88

89 **Figure S1: Bird richness map for the waterbird sample based on data from BirdLife and NatureServe.<sup>3</sup> Presence**  
 90 **values are chosen from categories 1 to 3, values for season are at 1 to 5 (see Table S4).**

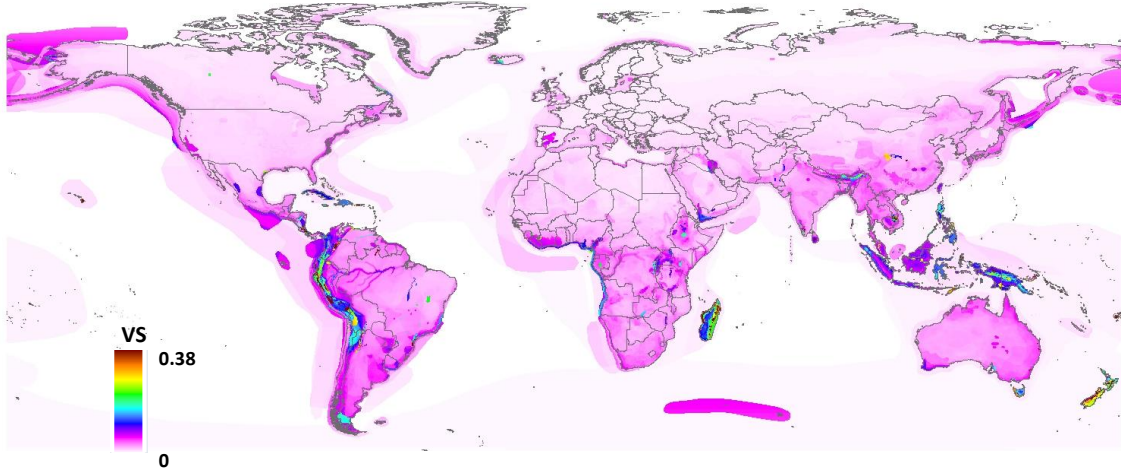

91

92 **Figure S2: Bird vulnerability score (VS) map for waterbirds. Presence values are chosen from categories 1 to 3, values**  
 93 **for season are at 1 to 5 (see Table S4).**

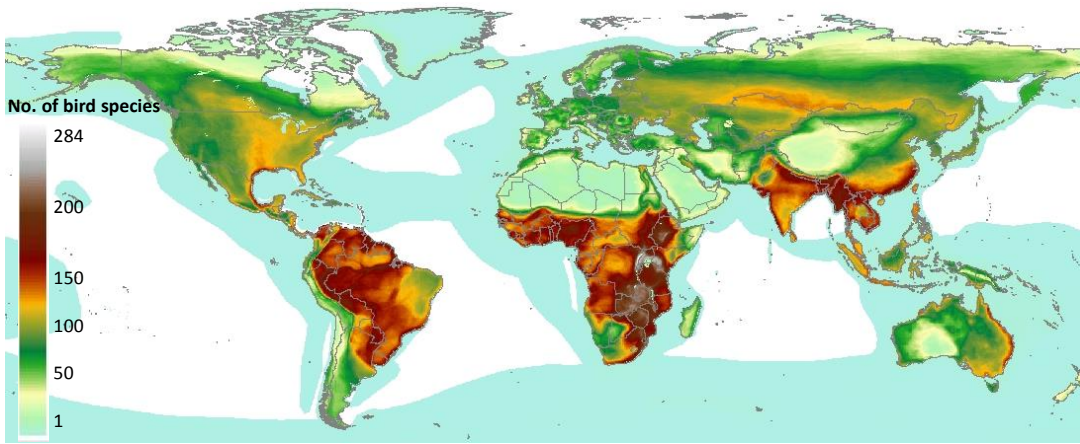

94

95 **Figure S3: Bird richness map for the waterbird sample based on data from BirdLife and NatureServe.<sup>3</sup> Presence**  
 96 **values are chosen from categories 1 to 4 (instead of 1 to 3), values for season remain at 1 to 5 (see Table S4). Base map**  
 97 **with country boundaries adapted from ref.<sup>8</sup>**

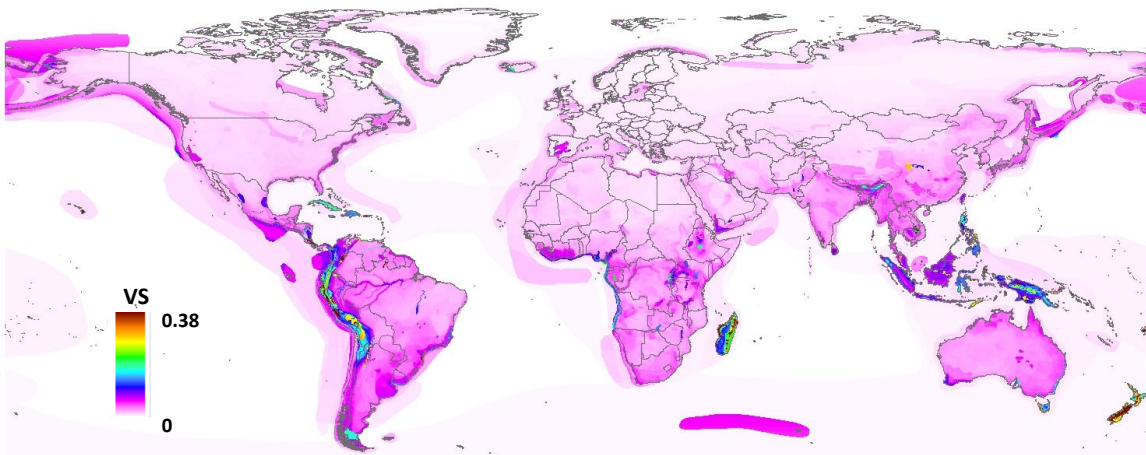

98

99 **Figure S4: Bird vulnerability score (VS) map for waterbirds. Presence values are chosen from categories 1 to 4**  
 100 **(instead of 1 to 3), values for season remain at 1 to 5 (see Table S4).**

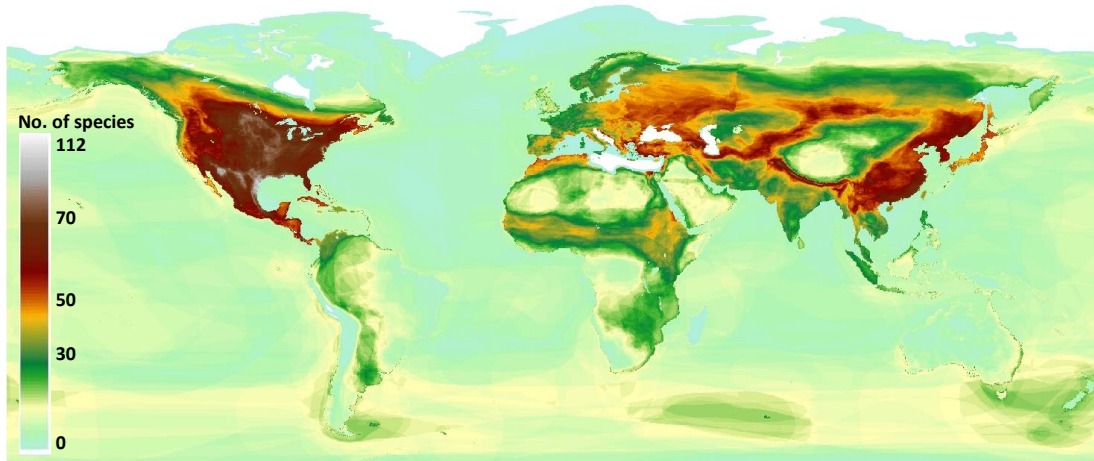

101

102 **Figure S5: Bird richness map for the non-residential birds based on data from BirdLife and NatureServe.<sup>3</sup> Presence**  
 103 **values are chosen from categories 1 to 3, values for season are at 2 to 5 (see Table S4).**

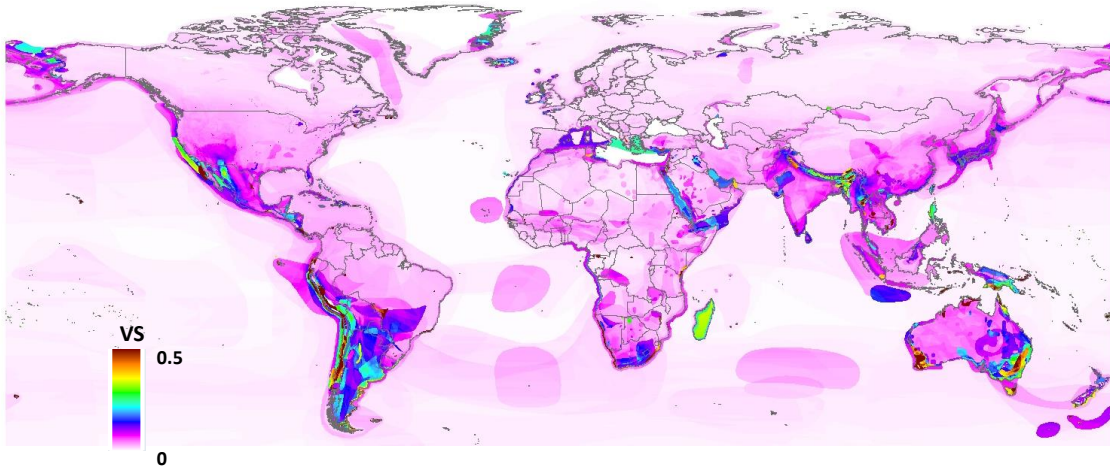

104

105 **Figure S6: Bird vulnerability score (VS) map for non-residential birds. Presence values are chosen from categories 1**  
 106 **to 3, values for season are at 2 to 5 (see Table S4).**

107

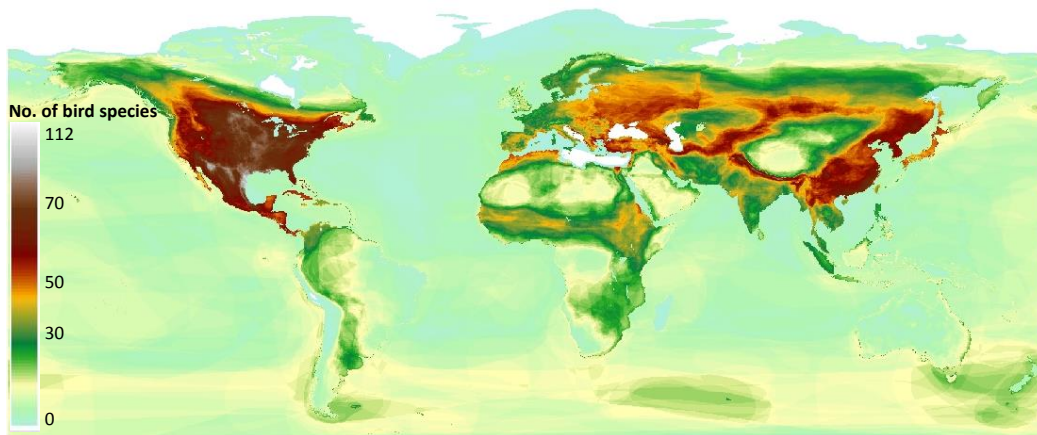

108

109 **Figure S7: Bird richness map for the non-residential birds based on data from BirdLife and NatureServe.<sup>3</sup> Presence**  
 110 **values are chosen from categories 1 to 4 (instead of 1 to 3), values for season remain at 2 to 5 (see Table S4).**

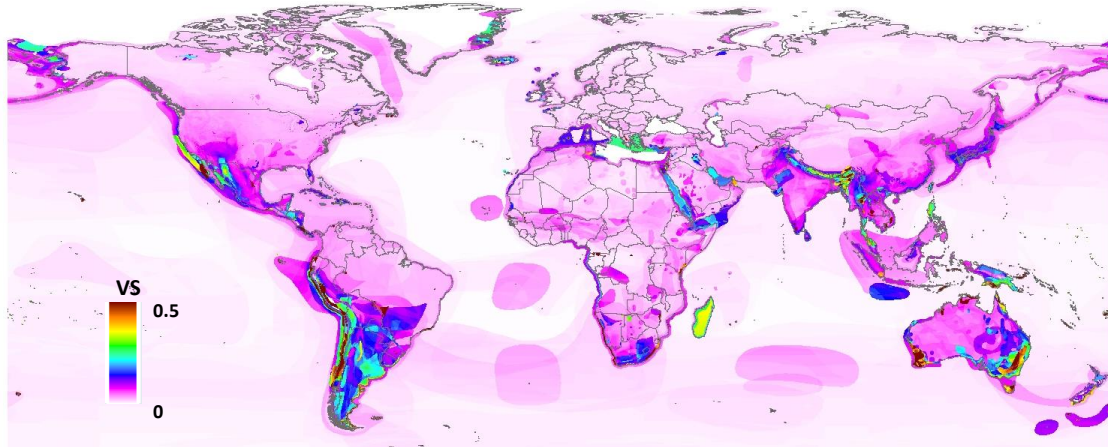

111

112 **Figure S8: Bird vulnerability score (VS) map for non-residential birds. Presence values are chosen from categories 1**  
 113 **to 4 (instead of 1 to 3), values for season remain at 2 to 5 (see Table S4).**

114 The largest difference between species richness calculated with presence values 1 to 3, or with  
 115 presence values 1 to 4, was 7 for waterbirds (The Bahamas), and 6 for non-residential birds  
 116 (St.Helena). None of them were in areas where one of our 1184 Ramsar wetlands was located.

117 **S4. Reptile maps**

118 Reptile maps were derived based on data from IUCN.<sup>4, 6</sup> We only used those species which were  
 119 classified as having “Wetland (inland)” as habitat. The categories for presence and seasonality from  
 120 Table S4 are valid for reptiles as well. All seasonality values were used, and for presence categories  
 121 we changed between 1 to 3 and 1 to 4. The maps and corresponding vulnerability scores (VS) are  
 122 shown in Figure S9 to Figure S12.

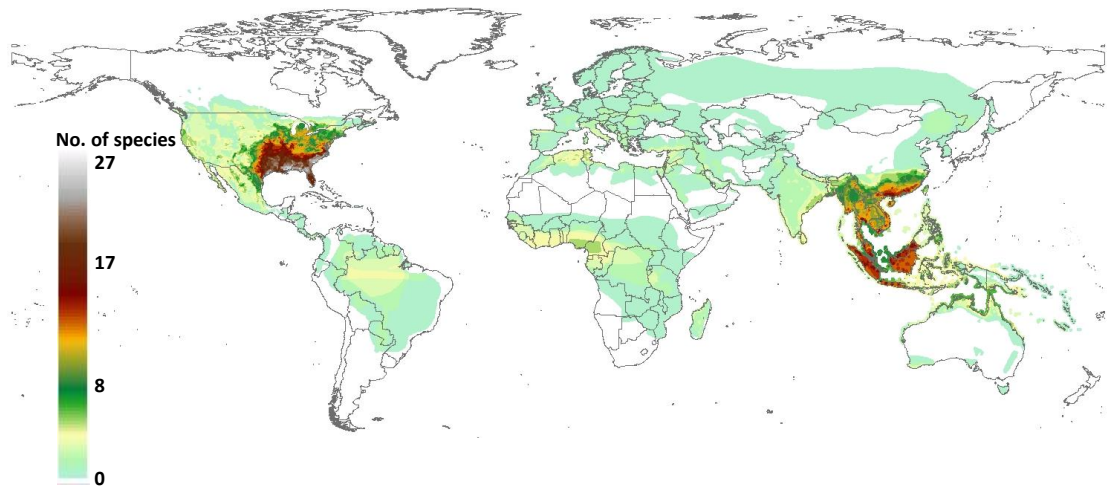

123

124 **Figure S9: Species richness map of wetland reptiles based on data from IUCN.<sup>4, 6</sup> Presence values are chosen from**  
 125 **categories 1 to 3. Base map with country boundaries adapted from ref.<sup>8</sup>**

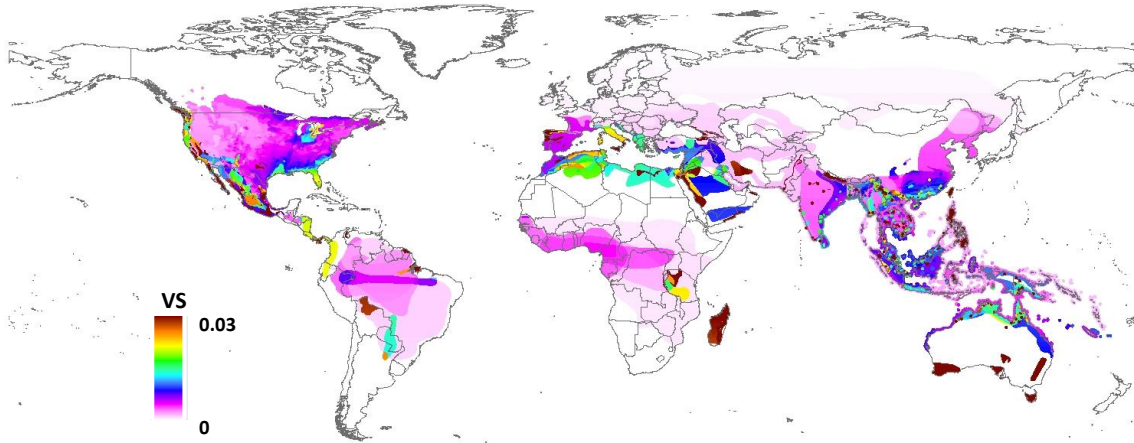

126

127 **Figure S10: Map of the vulnerability score (VS) of wetland reptiles based on data from IUCN.<sup>4,6</sup> Presence values are**  
 128 **chosen from categories 1 to 3. Base map with country boundaries adapted from ref.<sup>8</sup>**

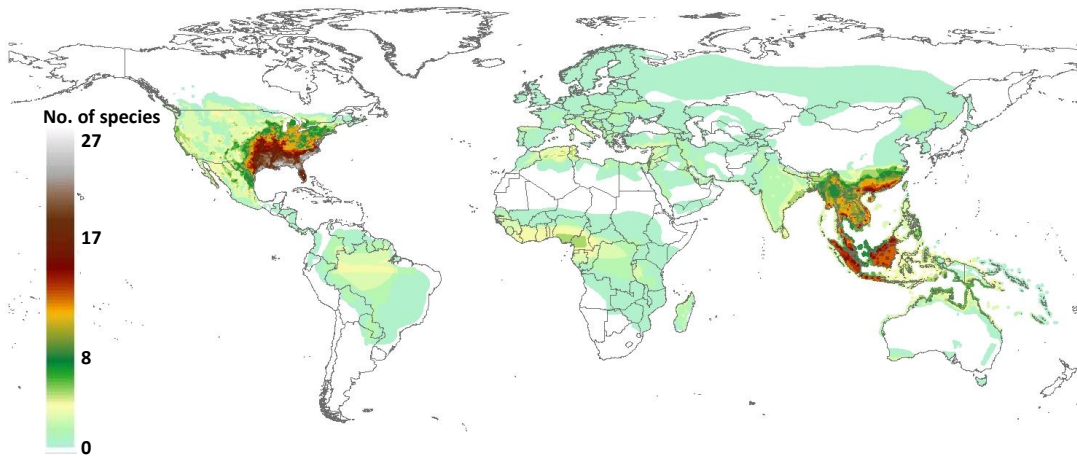

129

130 **Figure S11: Species richness map of wetland reptiles based on data from IUCN.<sup>4,6</sup> Presence values are chosen from**  
 131 **categories 1 to 4 (instead of 1 to 3). Base map with country boundaries adapted from ref.<sup>8</sup>**

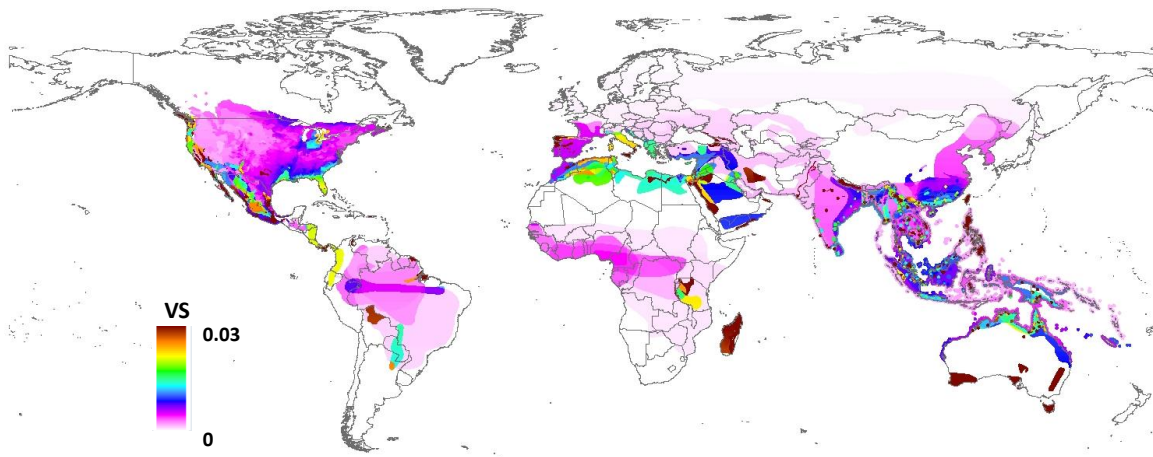

132

133 **Figure S12: Map of the vulnerability score (VS) of wetland reptiles based on data from IUCN.<sup>4,6</sup> Presence values are**  
 134 **chosen from categories 1 to 4 (instead of 1 to 3). Base map with country boundaries adapted from ref.<sup>8</sup>**



135 **S5. Amphibian maps**

136 Amphibian maps were derived based on data from IUCN.<sup>4,5</sup> All amphibian species were used. The  
137 categories for presence and seasonality from Table S4 are valid for reptiles as well. All seasonality  
138 values were used, and for presence categories we altered between 1 to 3 and 1 to 4. The maps and  
139 corresponding vulnerability scores (VS) are shown in Figure S13 to Figure S16.

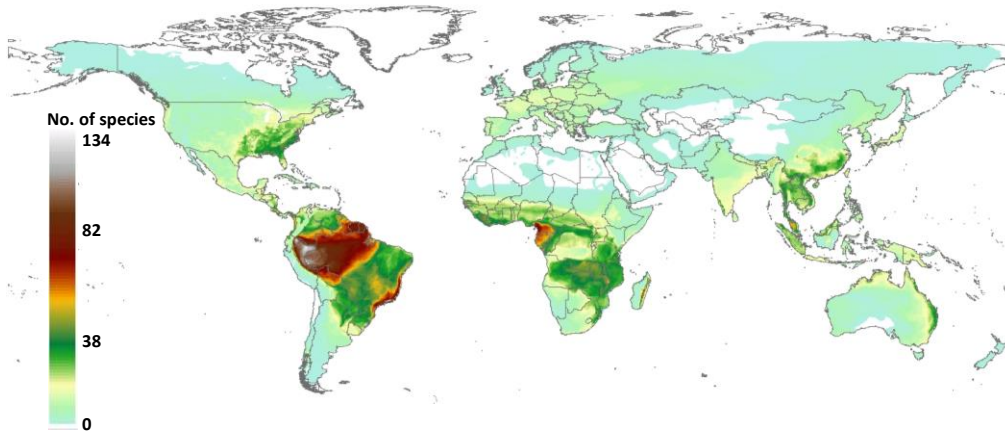

140

141 **Figure S13: Species richness map of amphibians based on data from IUCN.<sup>4,5</sup> Presence values are chosen from**  
142 **categories 1 to 3. Base map with country boundaries adapted from ref.<sup>8</sup>**

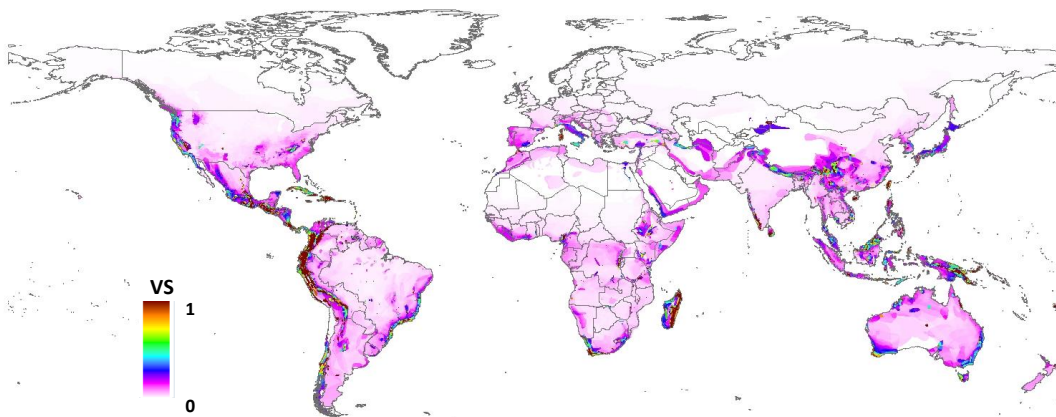

143

144 **Figure S14: Map of the vulnerability score (VS) of amphibians based on data from IUCN.<sup>4,5</sup> Presence values are**  
145 **chosen from categories 1 to 3. Base map with country boundaries adapted from ref.<sup>8</sup>**

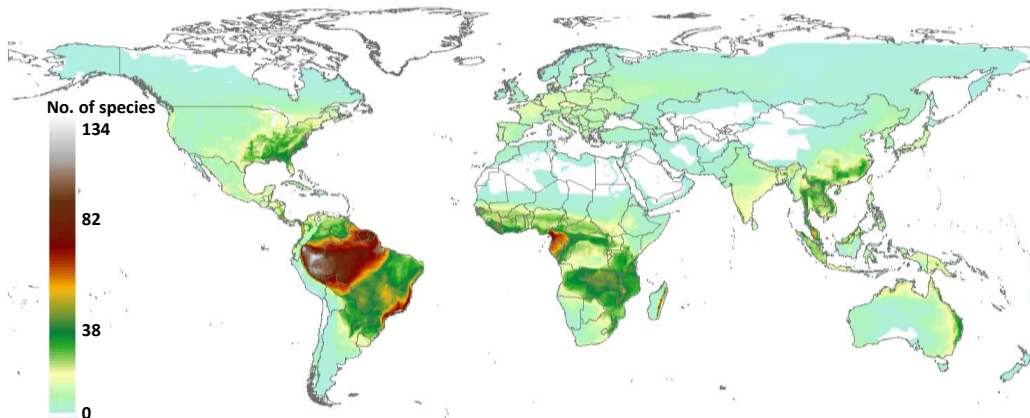

146

147 **Figure S15: Species richness map of amphibians based on data from IUCN.<sup>4,5</sup> Presence values are chosen from**  
148 **categories 1 to 4 (instead of 1 to 3). Base map with country boundaries adapted from ref.<sup>8</sup>**

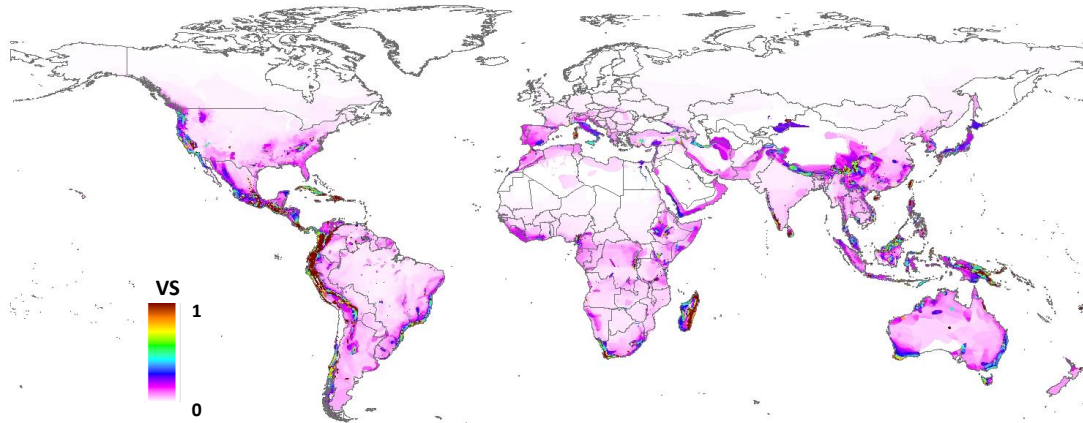

149

150 **Figure S16: Map of the rarity score of amphibians based on data from IUCN.<sup>4,5</sup> Presence values are chosen from**  
 151 **categories 1 to 4 (instead of 1 to 3). Base map with country boundaries adapted from ref.<sup>8</sup>**

152 **S6. Mammal maps**

153 Maps for the number of water-dependent mammals and the respective vulnerability scores are shown  
 154 in Figure S17 to Figure S20. The mammal suitability model was developed by the Global Mammal  
 155 Assessment (see e.g. ref<sup>7</sup>)

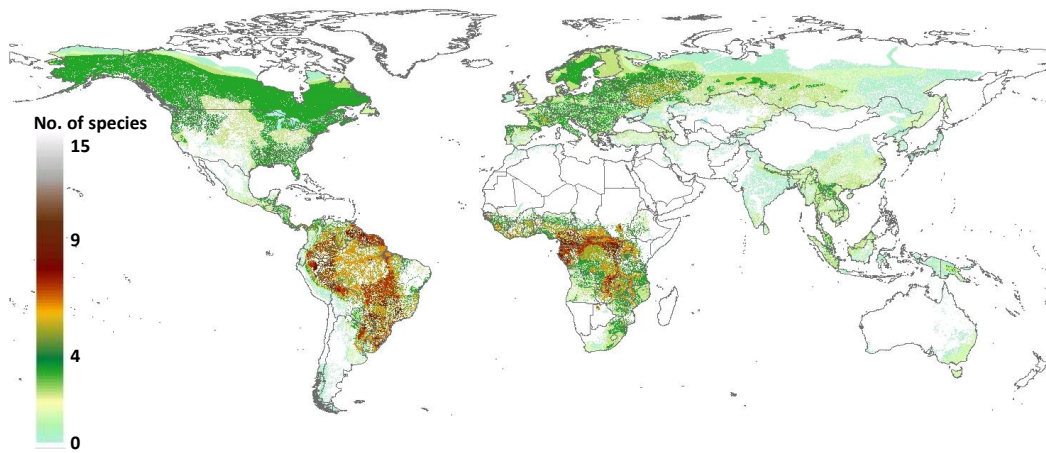

156

157 **Figure S17: Species richness of water-dependent mammals based on the extent of occurrence of the mammals. Base**  
 158 **map with country boundaries adapted from ref.<sup>8</sup>**

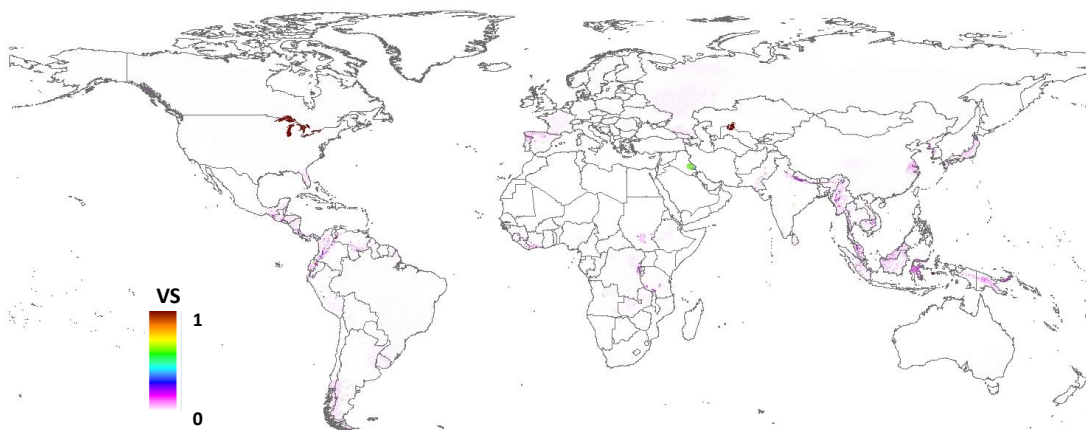

159

160 **Figure S18: Vulnerability score (VS) of the water-dependent mammals, based on the extent of occurrence of the**  
 161 **mammals. Base map with country boundaries adapted from ref.<sup>8</sup>**

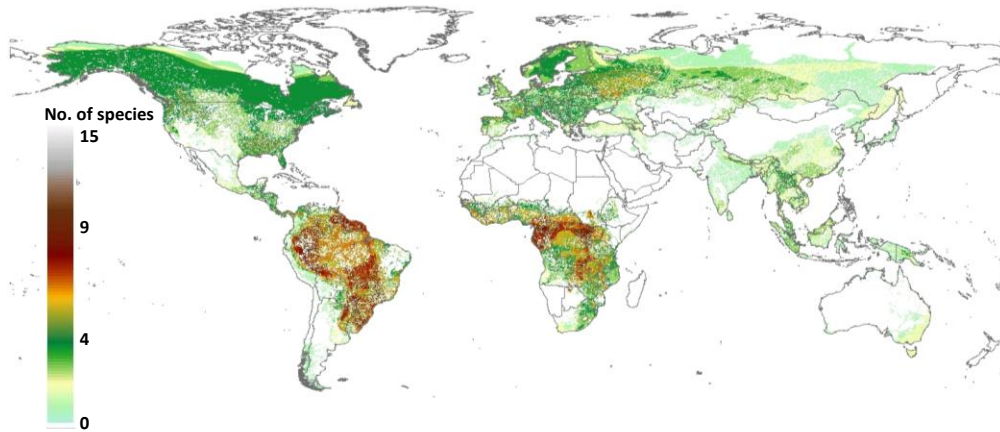

162

163 **Figure S19: Species richness of water-dependent mammals based on the suitable habitat of the mammals (AOO). Base**  
 164 **map with country boundaries adapted from ref.<sup>8</sup>**

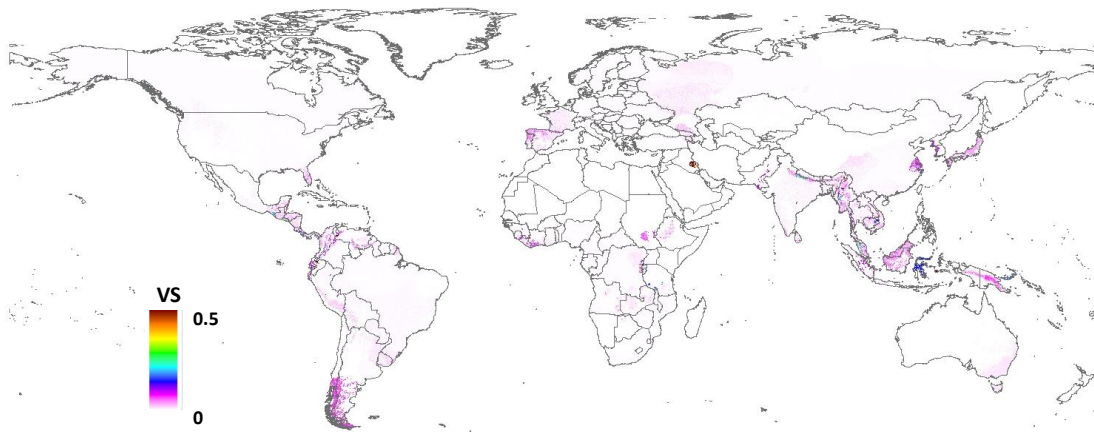

165

166 **Figure S20: Vulnerability score (VS) of the water-dependent mammals, based on the suitable habitat of the mammals**  
 167 **(AOO). Base map with country boundaries adapted from ref.<sup>8</sup>**

168 Difference between species richness map with EOO and AOO is small. The reason is that, as water-  
 169 dependent mammals are limited to waterbodies, the difference between AOO and EOO is not large,  
 170 and that AOO represents a nested subset of the EOO data. The geographical outermost boundary can  
 171 only follow waterbody borders, as in the AOO.

## 172 **S7. CpA – Waterbody count per area**

173 The waterbody count per area (CpA) data set is derived, as described in the main manuscript, based on  
 174 the rivers of the world dataset<sup>9</sup> and the global lakes and wetland database<sup>10</sup> by counting how many  
 175 points (i.e. waterbodies or river sections) fall into each sub-watersheds area (N in Equation S1).<sup>9</sup>  
 176 Dividing the number of points by the area of the sub-watershed (A in Equation S1) and multiplying  
 177 with an aridity index (precipitation P<sup>11</sup> divided by potential evapotranspiration PET<sup>12</sup>) leads to a value  
 178 set that tells us for each pixel i how large the habitat loss risk in the network of waterbodies in each  
 179 pixel is (taking into account a potential larger density of temporary pools by multiplying with the  
 180 aridity index). By dividing all values with the maximum value, CpA is scaled between 0 and 1 and  
 181 becomes unitless. If there is little water, the pixel had higher chances of becoming unsuitable as  
 182 habitat, thus if the CpA is small, the habitat loss risk is large.

$$CpA_i = \frac{\frac{N_{per\ subwatershed,i}}{A_{subwatershed,i}} \cdot \frac{P_i}{PET_i}}{\max CpA_i}$$

183

184

Equation S1

185 Iceland, Norway, Finland, as well as parts of Sweden and Eastern Russia are not covered in the dataset  
 186 for the watersheds.<sup>9</sup> The closest available CpA values were thus assumed to be valid in the  
 187 administrative regions of these countries which were missing for calculating the CpA. As they have a  
 188 high CpA, they are not relevant and this simplification is acceptable. For remote islands for which no  
 189 P, PET, rivers and lakes data were available in global databases (e.g. Azores), a CpA of 1 was  
 190 assumed. Since there was no indication about counts of waterbodies, we decided to set CpA to 1 in  
 191 these cases, although this was not a conservative assumption and the damage is likely to be  
 192 underestimated. However, this concerns only very few wetlands on individual islands and these small,  
 193 data deficient wetlands would need a closer look in future. For islands close to the mainland, the  
 194 closest mainland value was assigned to the island (e.g. Malta received its value from Sicily).

195 The resolution of the CpA data set (Figure S21) is 0.167°x0.167° since this was the resolution of the  
 196 precipitation dataset (coarsest dataset).

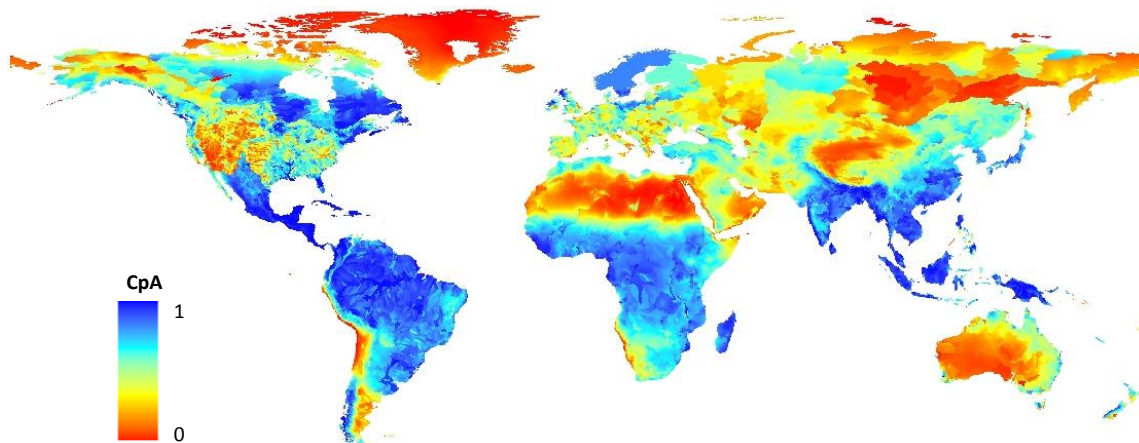

197

198 **Figure S21: Habitat loss risk index CpA.**

199 CpA=1 are areas with a large density of waterbodies, and as the value approaches zero, wetland  
 200 habitats get more rare. The smaller the CpA, the rarer the waterbodies and the larger the threat of  
 201 losing the habitat type “wetland/waterbody” in the region, when water is consumed.

## 202 **S8. Species-area relationship and z-values**

203 The formula of the species-area relationship is shown in Equation S2. The species richness S can be  
 204 predicted from a habitat area A, an exponent z indicating the slope of the species richness curve and a  
 205 constant c. z is often determined for specific curves, but a common value of 0.25 is often applied.<sup>13</sup>

$$S = c \cdot A^z$$

206

207

Equation S2

208 For a known area change a new species richness  $S_{new}$  can thus be predicted based on the original area  
 209 and species richness, as shown in Equation S3.

$$S_{new} = \left( \frac{A_{new}}{A_{original}} \right)^z \cdot S_{original}$$

210

211

**Equation S3**

212 The number of lost species  $S_{lost}$  from the original area is thus (Equation S4).

$$S_{lost} = S_{original} - S_{new} = S_{original} - \left( \frac{A_{new}}{A_{original}} \right)^z \cdot S_{original} = \left( 1 - \left( \frac{A_{new}}{A_{original}} \right)^z \right) \cdot S_{original}$$

213

214

**Equation S4**

215 The range of the z values applied for the different taxa are shown in Table S5. All values are taken  
 216 from Drakare et al.<sup>14</sup> For birds and mammals, we only used the z-values from nested studies because  
 217 they best represent pure diversity change over different sampling area sizes, are best suited to the  
 218 power model employed, and are more suited for extrapolation beyond the range of area sizes used to  
 219 derive the z-value.<sup>15</sup> For reptiles and amphibians, we used z-values from independent (non-nested)  
 220 studies from the same data source, since no values for nested studies were available. Values across  
 221 multiple studies for a single taxon were averaged to derive taxon-specific<sup>14</sup> values. All z-values are  
 222 close to the commonly used z-value of 0.25.<sup>13, 16, 17</sup>

223 **Table S5: Minimum, maximum and average slopes of the species-area relationship for the different taxa.<sup>14</sup>**

| Taxon      | zmin  | zmax | zaverage | No. of studies used |
|------------|-------|------|----------|---------------------|
| birds      | 0.15  | 0.63 | 0.37     | 8 (nested)          |
| mammals    | -0.24 | 0.93 | 0.34     | 4 (nested)          |
| reptiles   | 0.08  | 0.81 | 0.33     | 10 (independent)    |
| amphibians | 0.04  | 0.36 | 0.20     | 18 (independent)    |

## 224 **S9. Characterization factors – determining individual catchments**

225 All characterization factors (CFs) are applicable on a larger scale than just the wetland itself. The  
 226 reasoning is explained below for surface water-fed and groundwater-fed wetlands separately.

### 227 **Surface water-fed wetlands**

228 A surface water-fed wetland is fed by inflowing water from the catchment upstream of the wetland. If  
 229 water is consumed anywhere in the area upstream of the wetland, inflow will be reduced and the  
 230 wetland will be damaged. Therefore, the CF for this wetland is applicable in the whole watershed of  
 231 the wetland (e.g. blue watershed in Figure S22). A second wetland, which is for instance situated  
 232 upstream of the first one, may receive water from partly the same sources. But other rivers, for  
 233 example, may be completely irrelevant for the second wetland, because they do not flow into this  
 234 specific wetland. Thus, the CF for the second wetland is applicable in another area, which is the  
 235 individual catchment of the second wetland (e.g. orange area in Figure S22). However, water which is  
 236 consumed in the range area does not reach both wetlands and therefore both of them are damaged and  
 237 the CFs of both are applicable. That means that the CFs are summed in these areas. This procedure is  
 238 repeated for all 1033 surface water-fed wetlands and leads to the global maps.

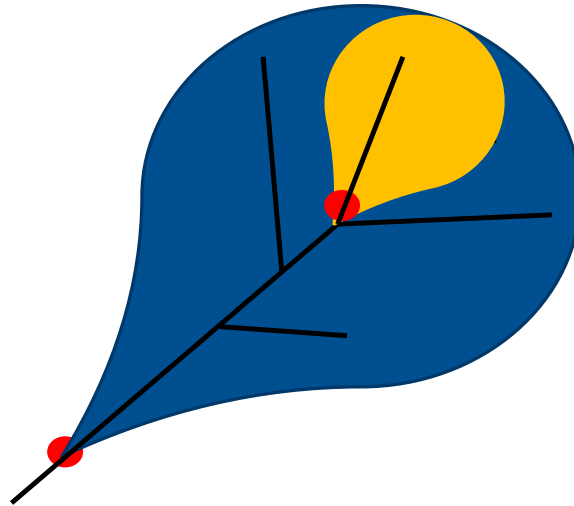

239

240 **Figure S22: Schematic representation of two surface water-fed wetlands (red dots) in their respective watersheds**  
 241 **(blue and orange). The river network is shown in black.**

242 **Groundwater-fed wetlands**

243 Here the relevant area is calculated according to the hydrogeological condition surrounding the  
 244 wetland (not upstream-downstream as in the surface water-fed wetland cases). The Area of Relevance  
 245 (AoR) has been used for the calculation of the FF before (for details see ref<sup>18</sup>). In principle, we  
 246 determined circles around the wetlands from which water is being drawn to the wetland (imagining the  
 247 wetland to act like a pump). The decrease in groundwater level due to pumping anywhere in this Area  
 248 of Relevance influences the infiltrating amount into the wetland. Thus, any pumping within this area  
 249 leads to damage and thus the CF is applicable in the whole AoR. If there is a second groundwater-fed  
 250 wetland and their AoRs overlap, the CFs are summed, because it was assumed that pumping in that  
 251 region will damage both wetlands.

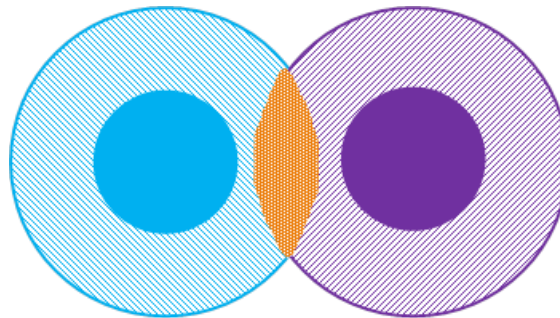

252

253

254 **Figure S23: Schematic representation of two Areas of Relevance (AoR, hatched circles) around two groundwater-fed**  
 255 **wetlands (blue and violet circle). The orange part is the area where the AoRs overlap and where CFs are thus**  
 256 **summed.**

257 **S10. EFs and CFs**

258 In Figure S24, an overview of all the necessary parameters and modeling steps for the calculation of  
 259 the EF is shown. As an example, all the values of the parameters for lake Naivasha and lake  
 260 Elmenteita (both in Kenya) are given in Table S6. These two wetlands are used in the application  
 261 example and have individual catchments. For the location Bleiswijk, no example is provided since the  
 262 used factor at the location consists of a several overlaying catchments of wetlands within the Rhine  
 263 watershed.

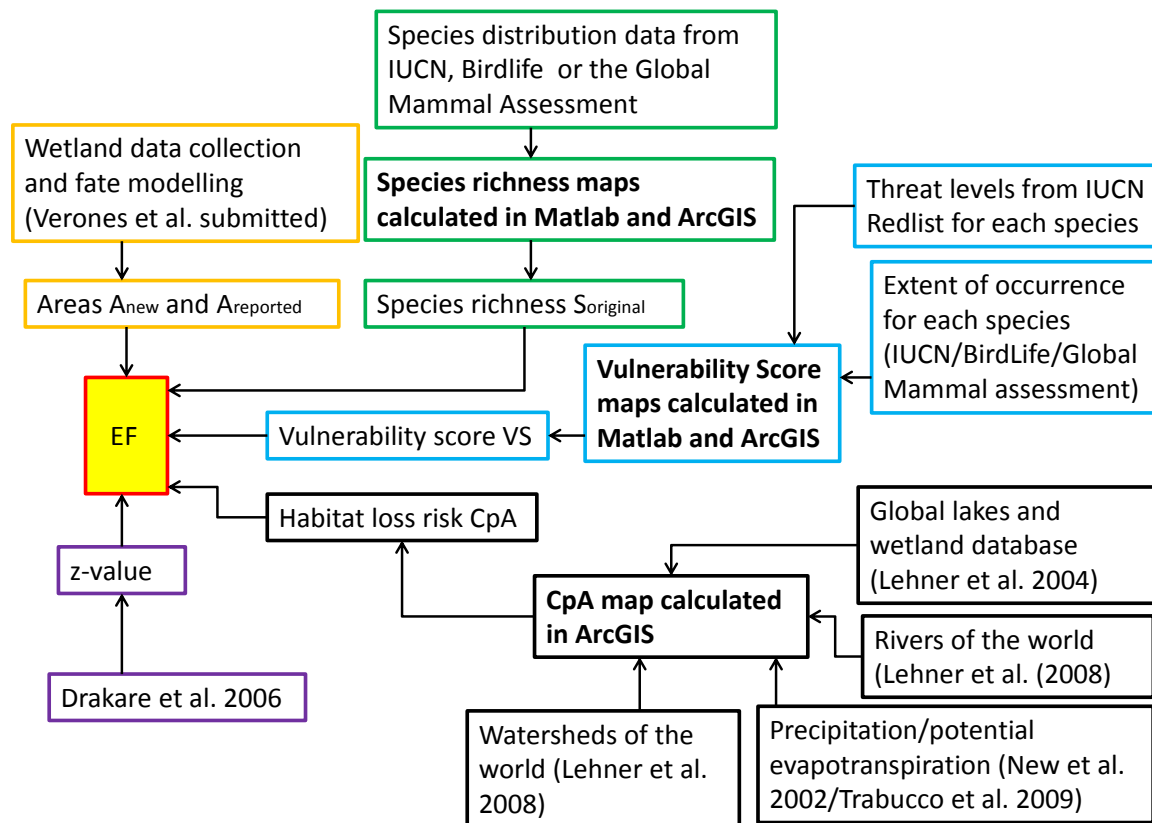

264

265 **Figure S24: Overview of the parameters and their origin, as well as the modeling steps that are required for**  
 266 **calculating the EFs of a wetland. Modeling steps are indicated in bold.**

267 **Table S6: Examples for all required parameters for calculating EFs for lake Naivasha (SW-fed, Kenya) and lake**  
 268 **Elmenteita (GW-fed, Kenya).**

|                                                          | Lake Naivasha | Lake Elmenteita | References/comments                                                                       |
|----------------------------------------------------------|---------------|-----------------|-------------------------------------------------------------------------------------------|
| Area reported [ha]                                       | 30000         | 10880           | RIS <sup>2</sup>                                                                          |
| Area new [ha]                                            | 29999         | 10879           | Calculated, see Verones et al. <sup>18</sup>                                              |
| CpA [-]                                                  | 0.064         | 0.027           | Habitat loss risk index (SI, S7)                                                          |
| z-value waterbirds[-]                                    | 0.37          | 0.37            | Based on Drakare et al.(2006) <sup>14</sup>                                               |
| z-value non-residential birds[-]                         | 0.37          | 0.37            | Based on Drakare et al.(2006) <sup>14</sup>                                               |
| z-value water-dependent mammals[-]                       | 0.34          | 0.34            | Based on Drakare et al.(2006) <sup>14</sup>                                               |
| z-value reptiles[-]                                      | 0.33          | 0.33            | Based on Drakare et al.(2006) <sup>14</sup>                                               |
| z-value amphibians[-]                                    | 0.20          | 0.20            | Based on Drakare et al.(2006) <sup>14</sup>                                               |
| Species richness waterbirds [no.of species]              | 250           | 245             | Maps, based on Birdlife/NatureServe data <sup>3</sup> (SI, S3)                            |
| Species richness non-residential birds [no.of species]   | 32            | 37              | Maps, based on Birdlife/NatureServe data <sup>3</sup> (SI, S3)                            |
| Species richness water-dependent mammals [no.of species] | 6             | 6               | Maps, data from global mammal assessment (SI, S6)                                         |
| Species richness reptiles [no.of species]                | 1             | 1               | Maps, based on IUCN data <sup>6</sup> (SI, S4)                                            |
| Species richness amphibians [no.of species]              | 29            | 24              | Maps, based on IUCN data <sup>5</sup> (SI, S5)                                            |
| Vulnerability score waterbirds [-]                       | 8.5E-06       | 8.5E-06         | Maps, based on Birdlife/NatureServe data <sup>3</sup> and IUCN data <sup>4</sup> (SI, S3) |
| Vulnerability score non-residential birds [-]            | 4.1E-06       | 3.8E-06         | Maps, based on Birdlife/NatureServe data <sup>3</sup> and IUCN data <sup>4</sup> (SI, S3) |
| Vulnerability score water-dependent mammals [-]          | 8.4E-06       | 6.9E-06         | Maps, based on IUCN data <sup>4</sup> (SI, S6)                                            |
| Vulnerability score reptiles [-]                         | 2.1E-06       | 2.1E-06         | Maps, based on IUCN data <sup>4</sup> (SI, S4)                                            |
| Vulnerability score amphibians [-]                       | 7.8E-05       | 1.1E-04         | Maps, based on IUCN data <sup>4</sup> (SI, S5)                                            |
| EF waterbirds [species-eq/m2]                            | 4.74E-11      | 2.66E-10        | Calculated                                                                                |
| EF non-residential birds[species-eq/m2]                  | 2.52E-12      | 1.78E-11        | Calculated                                                                                |
| EF water-dependent mammals [species-eq/m2]               | 9.52E-13      | 4.53E-12        | Calculated                                                                                |
| EF reptiles [species-eq/m2]                              | 3.58E-14      | 2.35E-13        | Calculated                                                                                |
| EF amphibians [species-eq/m2]                            | 2.37E-11      | 1.90E-10        | Calculated                                                                                |

269 Bird species are present in all wetlands. This does not apply to the other taxa. In Table S7, the number  
 270 of wetlands is shown that do not harbour mammals, reptiles or amphibians.

271 **Table S7: Number of wetlands that do not contain a certain taxa in absolute numbers and as percentage of wetland**  
 272 **type. SW stands for surface water-fed wetlands and GW for groundwater-fed wetlands.**

| Taxa                    | Number of wetlands zero |        | Percentage of wetlands zero |        |
|-------------------------|-------------------------|--------|-----------------------------|--------|
|                         | SW [-]                  | GW [-] | SW [%]                      | GW [%] |
| Waterbird               | 0                       | 0      | 0                           | 0      |
| Non-residential birds   | 0                       | 0      | 0                           | 0      |
| water-dependent mammals | 121                     | 28     | 12                          | 19     |
| reptiles                | 168                     | 25     | 16                          | 17     |
| amphibians              | 43                      | 6      | 4                           | 4      |

273

274 Effect and characterization factors calculated on the basis of the waterbody area are presented in Table  
 275 S8.

276 **Table S8: Effect factors [species-eq/m<sup>2</sup>] and characterization factors [species-eq·yr/m<sup>3</sup>] for waterbirds, non-residential**  
 277 **birds, water-dependent mammals, wetland reptiles, amphibians and all combined based on the area of the**  
 278 **waterbodies within the Ramsar sites. Factors are presented summarized for surface-fed wetlands with surface water**  
 279 **consumption (SW) and groundwater-fed wetlands with groundwater consumption (GW). Presence categories are 1 to**  
 280 **3 (birds, reptiles, amphibians). CV is the coefficient of variation.**

|                         | EF [species-eq/m <sup>2</sup> ] |          | CF [species-eq·yr/m <sup>3</sup> ] |          |
|-------------------------|---------------------------------|----------|------------------------------------|----------|
|                         | SW                              | GW       | SW                                 | GW       |
| waterbirds min          | 1.7E-13                         | 7.1E-13  | 1.7E-15                            | 6.8E-15  |
| waterbirds max          | 2.4E-05                         | 2.0E-06  | 1.1E-05                            | 1.3E-06  |
| waterbirds mean         | 5.8E-08                         | 3.0E-08  | 1.4E-08                            | 1.3E-08  |
| CV                      | 16                              | 6        | 25                                 | 8        |
| non-residents min       | 1.9E-15                         | 2.1E-13  | 5.3E-17                            | 1.2E-14  |
| non-residents max       | 2.0E-05                         | 1.8E-06  | 7.4E-06                            | 3.7E-06  |
| non-residents mean      | 5.6E-08                         | 3.2E-08  | 1.0E-08                            | 2.9E-08  |
| CV                      | 14                              | 5        | 23                                 | 10       |
| water-dep. mammals min  | 1.6E-15                         | 1.1E-14  | 3.4E-17                            | 1.7E-16  |
| water-dep. mammals max  | 2.0E-06                         | 4.7E-07  | 3.8E-08                            | 8.4E-08  |
| water-dep. mammals mean | 3.9E-09                         | 5.0E-09  | 3.4E-10                            | 7.9E-10  |
| CV                      | 17                              | 8        | 7                                  | 9        |
| wetland reptiles min    | 1.29E-16                        | 1.38E-14 | 2.01E-17                           | 7.91E-17 |
| wetland reptiles max    | 2.58E-05                        | 1.13E-05 | 1.72E-05                           | 1.11E-06 |
| wetland reptiles mean   | 3.53E-08                        | 8.19E-08 | 1.70E-08                           | 1.54E-08 |
| CV                      | 24                              | 11       | 32                                 | 8        |
| amphibians min          | 5.02E-16                        | 8.24E-15 | 5.62E-16                           | 6.74E-16 |
| amphibians max          | 6.47E-05                        | 9.79E-07 | 4.56E-05                           | 1.88E-06 |
| amphibians mean         | 1.29E-07                        | 3.14E-08 | 6.01E-08                           | 1.50E-08 |
| CV                      | 17                              | 4        | 24                                 | 10       |
| combined taxa min       | 2.5E-13                         | 1.1E-12  | 2.3E-15                            | 2.7E-14  |
| combined taxa max       | 8.1E-05                         | 1.1E-05  | 5.7E-05                            | 4.7E-06  |
| combined taxa mean      | 2.8E-07                         | 1.8E-07  | 1.0E-07                            | 7.4E-08  |
| CV                      | 13                              | 6        | 21                                 | 7        |

281

282

283

284

285



286 Characterization factors (CFs) calculated with the waterbody areas within the Ramsar area are shown  
287 in Figure S25 to Figure S36.

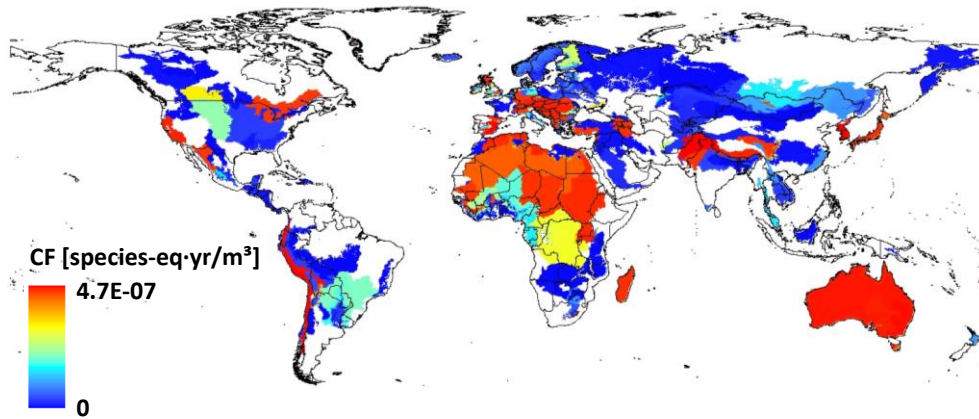

288

289 **Figure S25: CFs for surface water-fed wetlands with surface water consumption for waterbirds (presence 1 to 3)**  
290 **based on waterbody areas within the Ramsar areas. Base map with country boundaries adapted from ref.<sup>8</sup>**

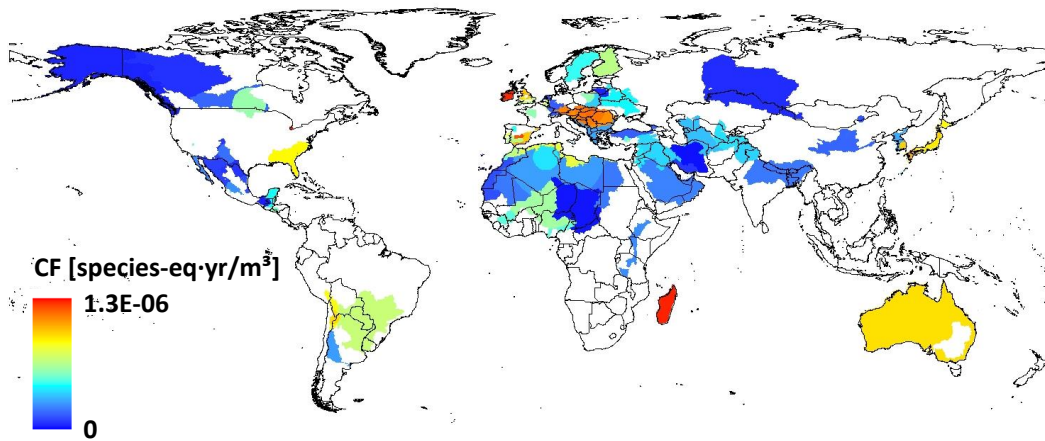

291

292 **Figure S26: CFs for groundwater-fed wetlands with groundwater consumption for waterbirds (presence 1 to 3)**  
293 **based on waterbody areas within the Ramsar areas. Base map with country boundaries adapted from ref.<sup>8</sup>**

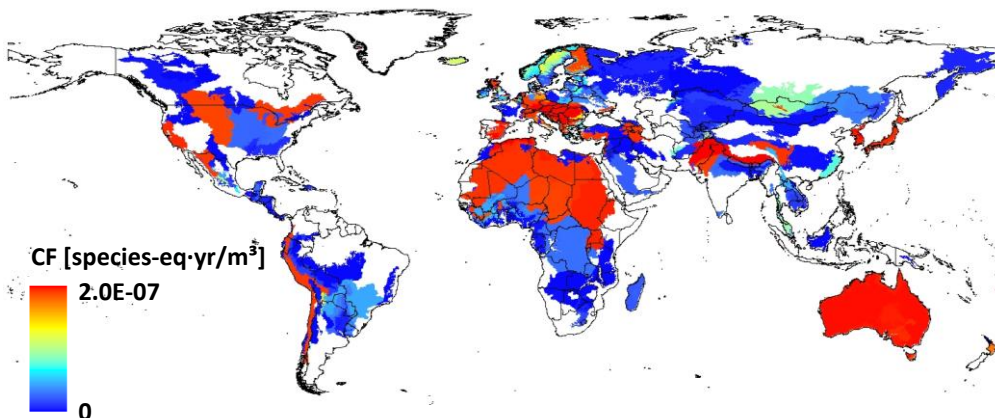

294

295 **Figure S27: CFs for surface water-fed wetlands with surface water consumption for non-residential birds (presence 1**  
296 **to 3) based on waterbody areas within the Ramsar areas. Base map with country boundaries adapted from ref.<sup>8</sup>**

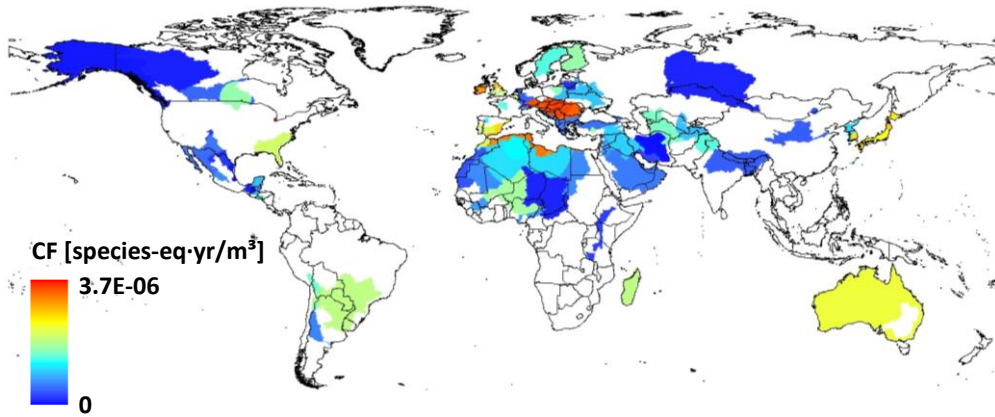

297

298 **Figure S28:** CFs for groundwater-fed wetlands with groundwater consumption for non-residential birds (presence 1  
299 to 3) based on waterbody areas within the Ramsar areas. Base map with country boundaries adapted from ref.<sup>8</sup>

300

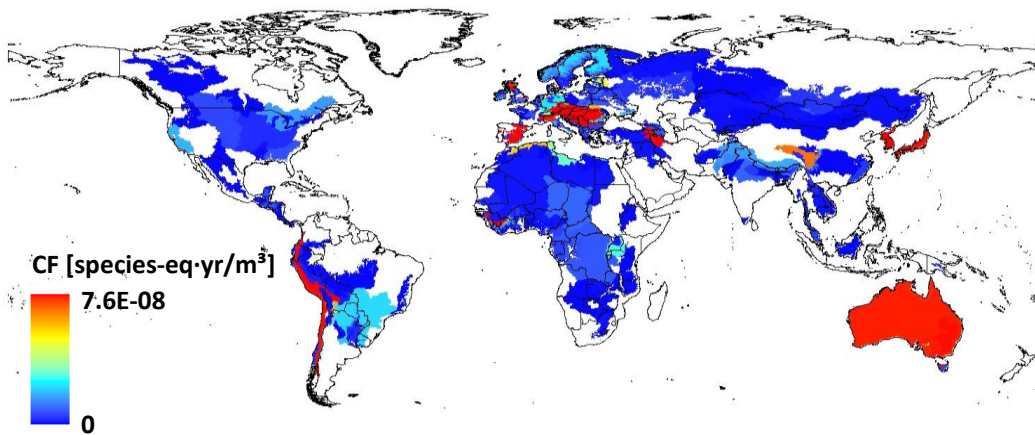

301

302 **Figure S29:** CFs for surface water-fed wetlands with surface water consumption for water-dependent mammals based  
303 on waterbody areas within the Ramsar areas. Base map with country boundaries adapted from ref.<sup>8</sup>

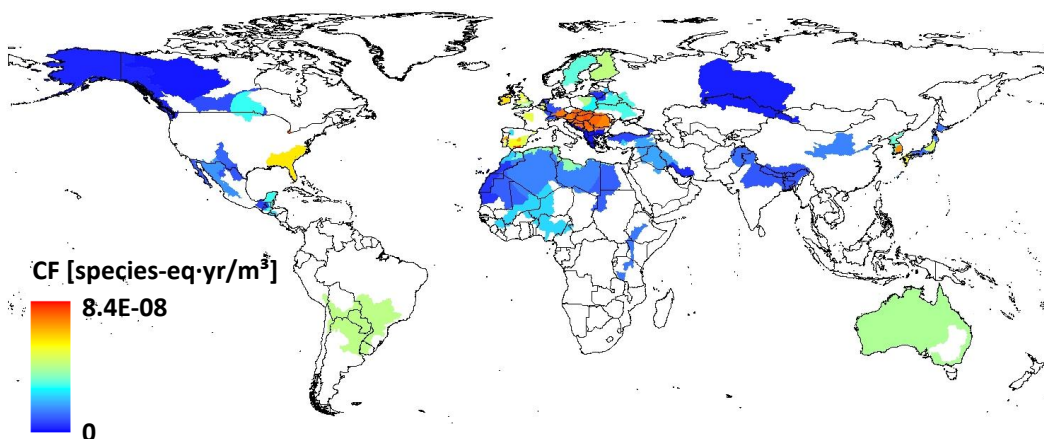

304

305 **Figure S30:** CFs for groundwater-fed wetlands with groundwater consumption for water-dependent mammals based  
306 on waterbody areas within the Ramsar areas. Base map with country boundaries adapted from ref.<sup>8</sup>

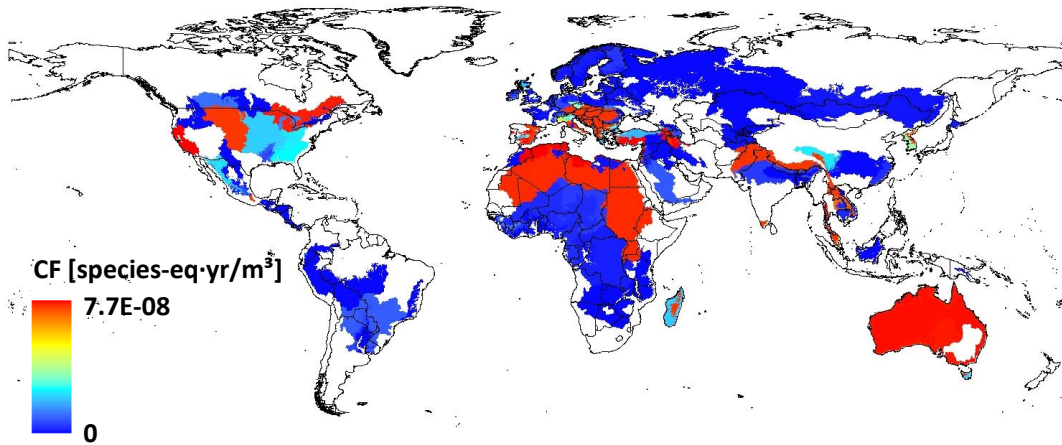

307

308 Figure S31: CFs for surface water-fed wetlands with surface water consumption for wetland reptiles based on  
 309 waterbody areas within the Ramsar areas. Base map with country boundaries adapted from ref.<sup>8</sup>

310

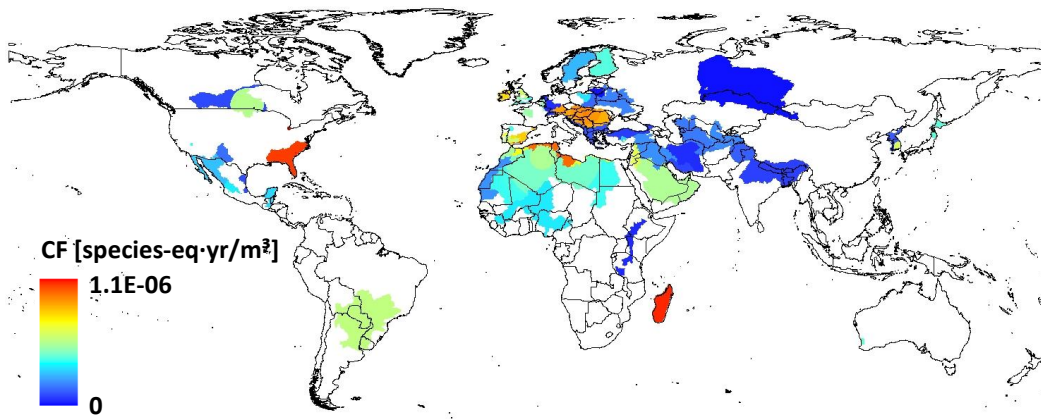

311

312 Figure S32: CFs for groundwater-fed wetlands with groundwater consumption for wetland reptiles based on  
 313 waterbody areas within the Ramsar areas. Base map with country boundaries adapted from ref.<sup>8</sup>

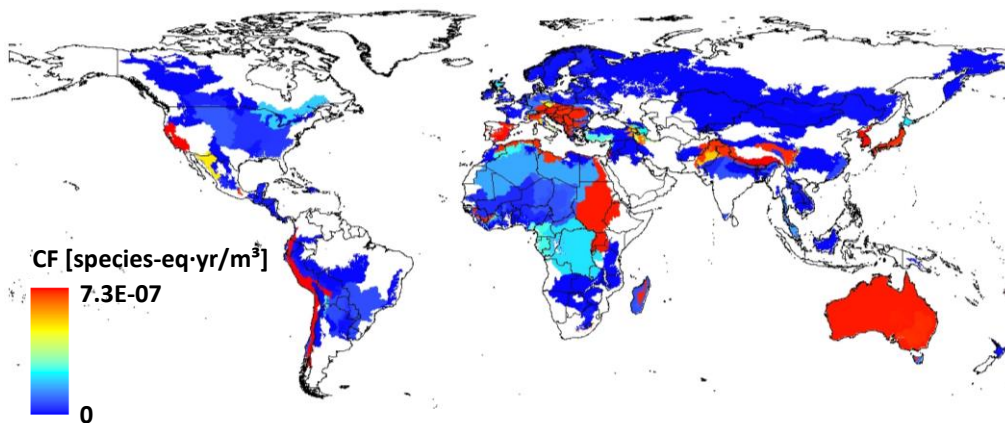

314

315 Figure S33: CFs for surface water-fed wetlands with surface water consumption for amphibians based on waterbody  
 316 areas within the Ramsar areas. Base map with country boundaries adapted from ref.<sup>8</sup>

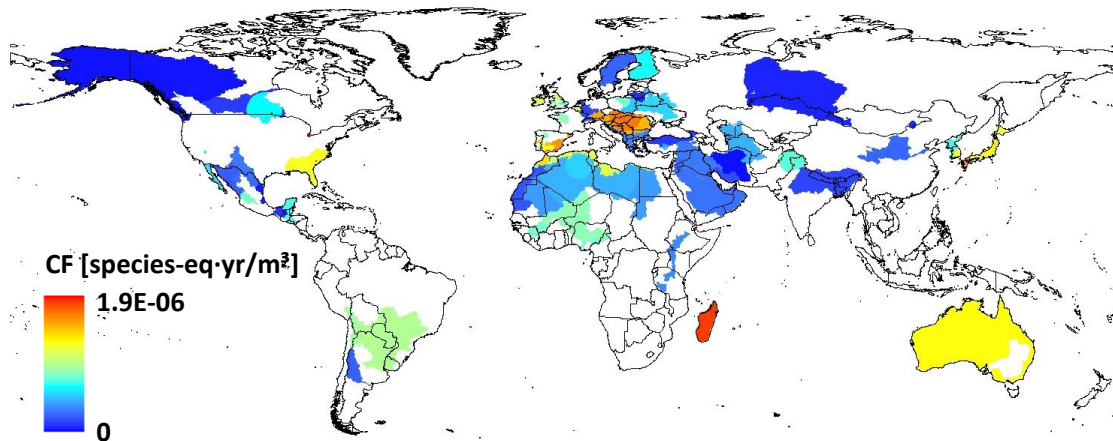

317

318 Figure S34: CFs for groundwater-fed wetlands with groundwater consumption for amphibians based on waterbody  
319 areas within the Ramsar areas. Base map with country boundaries adapted from ref.<sup>8</sup>

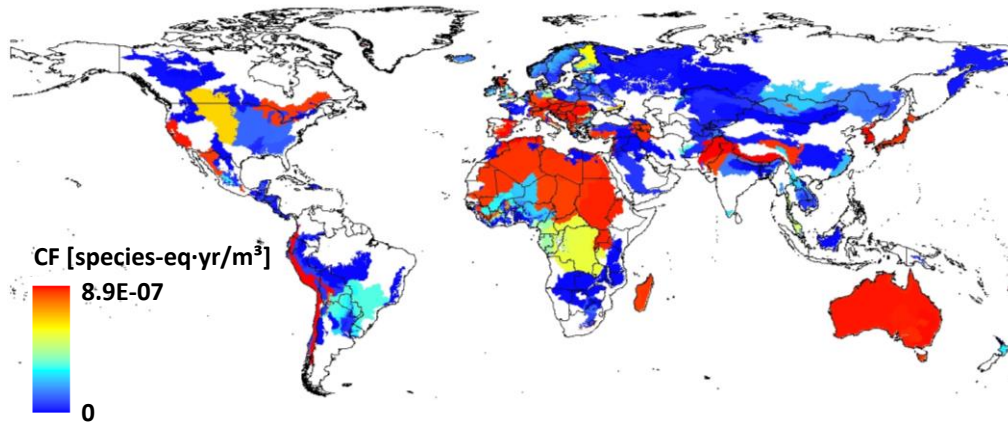

320

321 Figure S35: CFs for surface water-fed wetlands with surface water consumption for all taxa combined, based on  
322 waterbody areas within the Ramsar areas. Base map with country boundaries adapted from ref.<sup>8</sup>

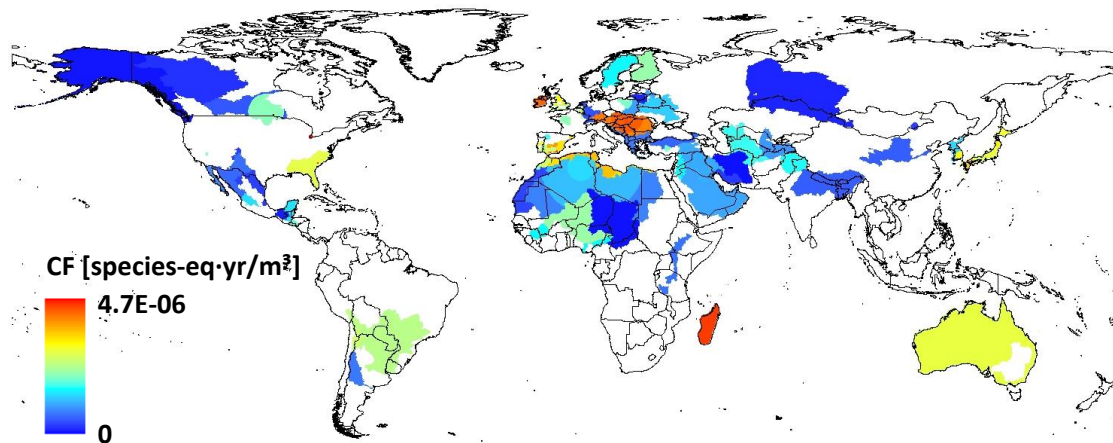

323

324 Figure S36: CFs for groundwater-fed wetlands with groundwater consumption for all taxa combined, based on  
325 waterbody areas within the Ramsar areas. Base map with country boundaries adapted from ref.<sup>8</sup>

## 326 S11. Sensitivities and correlations of EF and CF

327 The correlation between CFs of different taxa and correlations between different parts of the EF and  
328 the EF itself are shown in Table S9 and Table S10.

329 **Table S9: Spearman’s rank correlation coefficient  $\rho$  between CFs of different taxa and for both surface water- fed**  
 330 **(SW) and groundwater-fed (GW) wetlands. The color code indicates whether there is medium ( $\rho > 0.3$ , green with**  
 331 **green letters) or high correlation ( $\rho > 0.5$ , blue with yellow letters).**

| Water source | Correlation                              | Spearman $\rho$ [-] |
|--------------|------------------------------------------|---------------------|
| SW           | CF waterbirds – CF non-residential birds | 0.921               |
|              | CF waterbirds – CF mammals               | 0.653               |
|              | CF waterbirds –CF reptiles               | 0.535               |
|              | CF waterbirds – CF amphibians            | 0.836               |
|              | CF non-residential birds – CF mammals    | 0.606               |
|              | CF non-residential birds – CF reptiles   | 0.569               |
|              | CF non-residential birds – CF amphibians | 0.801               |
|              | CF mammals –CF reptiles                  | 0.490               |
|              | CF mammals –CF amphibians                | 0.689               |
|              | CF reptiles –CF amphibians               | 0.600               |
| GW           | CF waterbirds – CF non-residential birds | 0.967               |
|              | CF waterbirds – CF mammals               | 0.741               |
|              | CF waterbirds – CF reptiles              | 0.734               |
|              | CF waterbirds – CF amphibians            | 0.907               |
|              | CF non-residential birds – CF mammals    | 0.742               |
|              | CF non-residential birds – CF reptiles   | 0.757               |
|              | CF non-residential birds – CF amphibians | 0.923               |
|              | CF mammals –CF reptiles                  | 0.647               |
|              | CF mammals –CF amphibians                | 0.768               |
|              | CF reptiles –CF amphibians               | 0.711               |

332  
 333  
 334  
 335  
 336  
 337  
 338  
 339  
 340  
 341  
 342  
 343  
 344  
 345  
 346  
 347  
 348  
 349  
 350  
 351

352 **Table S10: Correlations between components of the effect factor and effect factor itself (EF), as well as the fate factor**  
 353 **(FF). Correlations are calculated for each taxa separately, except for the correlation between CpA and FF, which is**  
 354 **the same for all taxa and is thus only calculated for SW-fed and GW-fed wetlands. VS is the vulnerability score, S the**  
 355 **species number and CpA is the habitat loss risk index.**

| Water source      | Correlation          | Spearman $\rho$ [-] |
|-------------------|----------------------|---------------------|
|                   | CpA-FF               | -0.263              |
|                   | CpA-VS waterbirds    | 0.229               |
|                   | CpA-VS non-residents | 0.175               |
|                   | CpA-VS mammals       | 0.037               |
|                   | CpA-VS reptiles      | -0.016              |
|                   | CpA-VS amphibians    | 0.063               |
| SW                | S-VS waterbirds      | 0.429               |
|                   | S-VS non-residents   | 0.030               |
|                   | S-VS mammals         | 0.311               |
|                   | S-VS reptiles        | 0.551               |
|                   | S-VS amphibians      | 0.367               |
|                   | S-CpA waterbirds     | 0.259               |
|                   | S-CpA non-residents  | -0.054              |
|                   | S-CpA mammals        | 0.092               |
|                   | S-CpA reptiles       | 0.082               |
|                   | S-CpA amphibians     | 0.238               |
|                   | CpA-FF               | -0.005              |
|                   | CpA-VS waterbirds    | 0.305               |
|                   | CpA-VS non-residents | 0.379               |
|                   | CpA-VS mammals       | 0.241               |
| CpA-VS reptiles   | 0.025                |                     |
| CpA-VS amphibians | 0.250                |                     |
| GW                | S-VS waterbirds      | 0.275               |
|                   | S-VS non-residents   | 0.199               |
|                   | S-VS mammals         | 0.418               |
|                   | S-VS reptiles        | 0.791               |
|                   | S-VS amphibians      | 0.355               |
|                   | S-CpA waterbirds     | 0.562               |
|                   | S-CpA non-residents  | 0.404               |
|                   | S-CpA mammals        | 0.062               |
|                   | S-CpA reptiles       | 0.133               |
|                   | S-CpA amphibians     | 0.439               |
|                   | S-EF waterbirds      | -0.175              |
|                   | S-EF Nonresidents    | 0.161               |
|                   | S-EF mammals         | 0.193               |
|                   | S-EF reptiles        | 0.440               |
| S-EF amphibians   | 0.176                |                     |
| SW                | VS-EF waterbirds     | 0.136               |
|                   | VS-EF non-residents  | 0.194               |
|                   | VS-EF mammals        | 0.443               |
|                   | VS-EF reptiles       | 0.699               |
|                   | VS-EF amphibians     | 0.627               |
|                   | CpA-EF waterbirds    | -0.215              |
|                   | CpA-EF non-residents | -0.268              |
|                   | CpA-EF mammals       | -0.238              |
|                   | CpA-EF reptiles      | -0.183              |
|                   | CpA-EF amphibians    | -0.189              |
| GW                | S-EF waterbirds      | -0.016              |
|                   | S-EF non-residents   | 0.099               |
|                   | S-EF mammals         | 0.521               |
|                   | S-EF reptiles        | 0.577               |
|                   | S-EF amphibians      | 0.423               |
|                   | VS-EF waterbirds     | 0.046               |
|                   | VS-EF non-residents  | 0.206               |
|                   | VS-EF mammals        | 0.623               |
|                   | VS-EF reptiles       | 0.703               |
|                   | VS-EF amphibians     | 0.487               |
|                   | CpA-EF waterbirds    | -0.073              |
|                   | CpA-EF non-residents | -0.026              |
|                   | CpA-EF mammals       | 0.009               |
|                   | CpA-EF reptiles      | -0.129              |
| CpA-EF amphibians | 0.079                |                     |

357 We calculated the histogram of species richness, a dominant factor for the EF, and EFs themselves for  
 358 all taxa. They are shown for SW-fed and GW-fed wetlands in Figure S37. In Figure S37A, mammals  
 359 are with 912 wetlands highest in the bin category 10-20 species. Also, reptiles and amphibians are  
 360 mostly represented by 10-20 species (840 wetlands and 539 wetlands, respectively). The largest  
 361 number of wetlands for non-residential bird species is 235 in the species richness category 40-50  
 362 species. Only waterbirds show their maximum in an even higher category (80-90 species in 128  
 363 wetlands). The distribution of species richness is widest for waterbirds. In GW-fed wetlands (Figure  
 364 S37B), waterbird species are present in 29 wetlands with between 70 and 80 species. Non-residential  
 365 birds have their maximum with 50-60 species in 35 wetlands, and this is again a bit lower than for  
 366 SW-fed wetlands. Mammals, reptiles and amphibians are all mostly present with 10-20 species (123,  
 367 123 and 83 wetlands, respectively). For the EFs, the most frequent bins for the EFs are those between  
 368  $10^{-11}$  species-eq/m<sup>2</sup> and  $10^{-8}$  species-eq/m<sup>2</sup> (Figure S37C and D).

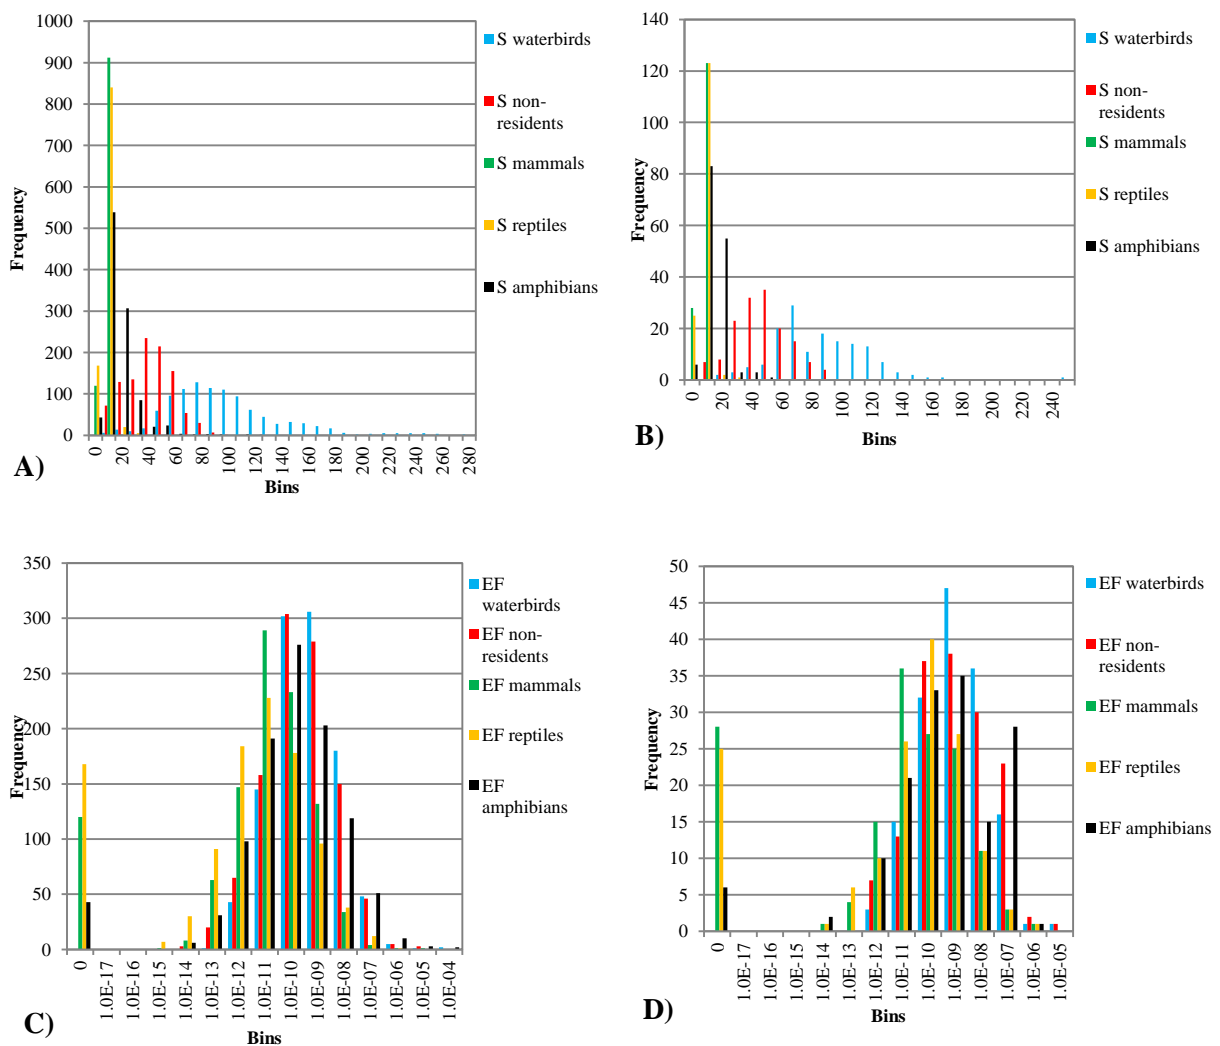

369 **Figure S37: Distribution of the species richness for A) SW-fed wetlands and B) GW-fed wetlands. The distribution for**  
 370 **the EF factors is shown in C) for SW-fed wetlands and D) for GW-fed wetlands.**

371 A large part of the sensitivity of the characterization factor comes from the fate factor (FF). The  
 372 sensitivity of the FF is discussed in detail in ref<sup>18</sup>. In Figure S38, the differences between the FFs for  
 373 different amounts of water consumption is shown as factor of the FF with 10 m<sup>3</sup>/yr consumption  
 374 divided by the FF with 1'000'000 m<sup>3</sup>/yr consumption. For the SW-fed wetlands, the differences are  
 375 small, since the factor varies over the whole globe only between 1 and 1.167. For the GW-fed  
 376 wetlands, the non-linearity of the well formula shows in the much larger differences between the FFs,  
 377 distributed over the world. As stated in ref<sup>18</sup>, caution should thus be applied when using the factors for  
 378 GW-fed wetlands.

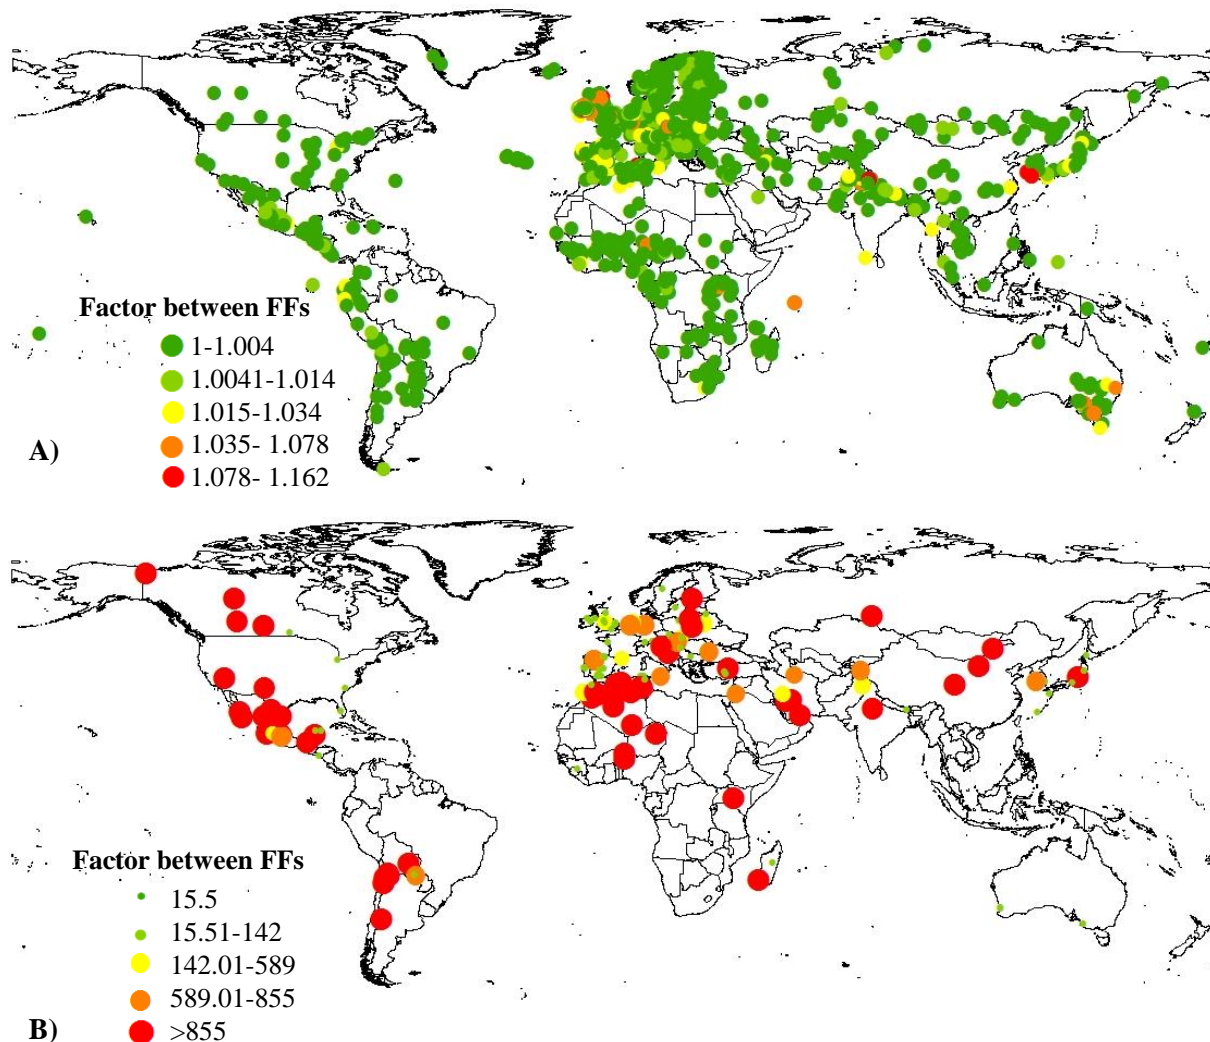

379 **Figure S38: Factor between FFs with different amounts of water consumption. A) for SW-fed wetlands. B) for GW-**  
 380 **fed wetlands. Base map with country boundaries adapted from ref.<sup>8</sup>**

381 Whether the CF is calculated with the Ramsar area or the waterbody area can make a substantial  
 382 difference, as is shown in Table S11 exemplarily for waterbirds (being the most dominant taxon). For  
 383 the other taxa the trend is similar. The table shows the relation between values that are once calculated  
 384 (CF, EF, FF) or extracted from maps (S, VS, CpA) based on Ramsar areas and once based on  
 385 waterbody areas. The median, as well as the 2.5% and 97.5% percentile (between them are 95% of the  
 386 data), are shown for these factors between Ramsar and waterbody areas based results. The difference  
 387 between species richness, CpA and the vulnerability score is very low. However, the difference in the  
 388 EF is larger, which is due to the non-linearity of the species-area relationship. In 95% of the data, the  
 389 difference of the FF is smaller than for the EF. For the GW-fed wetlands, the difference between the  
 390 FFs regarding waterbody or Ramsar area is negligible, because differences between the areas are often



391 smaller. This is probably a coincidence. Bear in mind that the sample for the SW-fed wetlands is  
 392 almost 10 times larger than for the GW-fed wetlands. The differences between CFs and EFs calculated  
 393 with either Ramsar or wetland areas for the other taxa, are shown in Table S12. Since the differences  
 394 for the FFs and the underlying area are the same, they are not repeated. The minor differences from S,  
 395 VS and CpA are not indicated.

396 **Table S11: Factors between different parameters calculated based on the waterbody and the Ramsar area of each**  
 397 **wetland, respectively. Between the 2.5% percentile and 97.5 % percentile 95% of the wetlands are found. These**  
 398 **values are for waterbirds, as this is the most dominant taxon and covers all wetlands.**

| Factor between waterbody and Ramsar value | SW-fed wetlands |                 |                  | GW-fed wetlands |                 |                  |
|-------------------------------------------|-----------------|-----------------|------------------|-----------------|-----------------|------------------|
|                                           | median          | 2.5% percentile | 97.5% percentile | median          | 2.5% percentile | 97.5% percentile |
| CF                                        | 1.25            | 0.92            | 70.14            | 1.60            | 0.64            | 62.44            |
| EF                                        | 1.67            | 0.97            | 55.24            | 1.67            | 1.00            | 63.23            |
| FF                                        | 0.93            | 0.12            | 10.53            | 1.00            | 0.19            | 1.00             |
| Underlying wetland area (A)               | 0.60            | 0.02            | 1.00             | 0.60            | 0.02            | 1.00             |
| Species richness (S)                      | 1.00            | 0.96            | 1.04             | 1.00            | 0.98            | 1.02             |
| Habitat loss risk (CpA)                   | 1.00            | 0.92            | 1.09             | 1.00            | 0.91            | 1.09             |
| Vulnerability score (VS)                  | 1.00            | 0.94            | 1.06             | 1.00            | 0.98            | 1.03             |

399

400 **Table S12: Factors for the taxa other than waterbirds between CF and EF calculated based on the waterbody and the**  
 401 **Ramsar area of each wetland, respectively. Between the 2.5% percentile and 97.5 % percentile 95% of the wetlands**  
 402 **are found. Factors between the FFs or the underlying areas are the same as for waterbirds.**

| Taxa                    | Factor between waterbody and Ramsar value | SW-fed wetlands |                 |                  | GW-fed wetlands |                 |                  |
|-------------------------|-------------------------------------------|-----------------|-----------------|------------------|-----------------|-----------------|------------------|
|                         |                                           | median          | 2.5% percentile | 97.5% percentile | median          | 2.5% percentile | 97.5% percentile |
| non-residential birds   | CF                                        | 1.24            | 0.88            | 73.31            | 1.60            | 0.64            | 61.74            |
|                         | EF                                        | 1.67            | 0.97            | 58.29            | 1.67            | 1.00            | 63.43            |
| water-dependent mammals | CF                                        | 1.22            | 0.90            | 53.65            | 1.50            | 0.67            | 32.49            |
|                         | EF                                        | 1.67            | 0.99            | 34.12            | 1.67            | 1.00            | 41.31            |
| reptiles                | CF                                        | 1.20            | 0.93            | 55.82            | 1.58            | 0.57            | 23.13            |
|                         | EF                                        | 1.67            | 1.00            | 42.12            | 1.67            | 1.00            | 28.27            |
| amphibians              | CF                                        | 1.24            | 0.85            | 57.64            | 1.57            | 0.63            | 44.07            |
|                         | EF                                        | 1.67            | 0.96            | 49.39            | 1.67            | 1.00            | 51.32            |

403

404 Overviews of the sensitivity analysis for the characterization factors (for each taxon and water source  
 405 separately) are shown in Figure S39 and Figure S40. The parameters that were important in the  
 406 sensitivity analyses of the fate factors (FF)<sup>18</sup> were used here again. In addition, the influence of  
 407 including possibly extinct species (presence category 4, see Table S4) was checked (for mammals:  
 408 area of occupancy instead of extent of occurrence). As for the FFs, the amount of water consumed,  
 409 surface water flow volumes, and hydraulic conductivity were most relevant. However, due to the non-  
 410 linear species-area relationship, the underlying area is now relevant for both SW-fed and GW-fed  
 411 wetlands, while for the FF it was only relevant for some GW-fed wetlands. The influence of including  
 412 possibly extinct species is in the majority of cases negligible. For the mammals, the change from the  
 413 extent of occurrence (EOO) to the actual area of occupancy (AOO) of the species had a slightly larger  
 414 influence, showing that for future developments the derivation of AOOs is relevant.

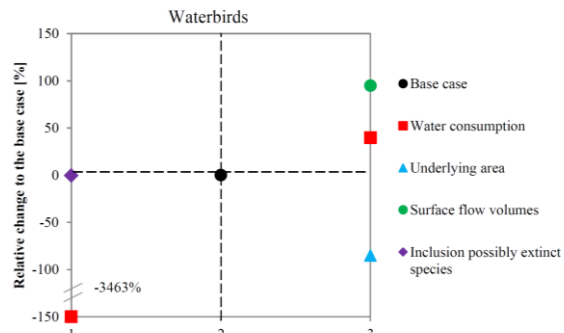

| parameter                               | 1            | 2 (base case) | 3              |
|-----------------------------------------|--------------|---------------|----------------|
| Water consumption [m <sup>3</sup> /yr ] | 10           | 1000          | 1'000'000      |
| underlying area [ha]                    | -            | Ramsar area   | waterbody area |
| surface flow volumes [-]                | -            | own model     | WaterGap       |
| Inclusion possibly extine species [-]   | Presence 1-4 | Presence 1-3  | -              |

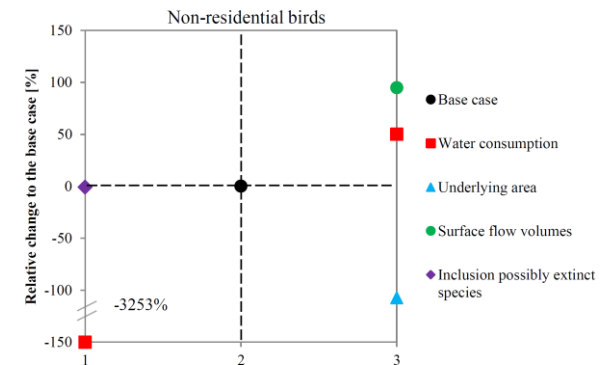

| parameter                               | 1            | 2 (base case) | 3              |
|-----------------------------------------|--------------|---------------|----------------|
| Water consumption [m <sup>3</sup> /yr ] | 10           | 1000          | 1'000'000      |
| underlying area [ha]                    | -            | Ramsar area   | waterbody area |
| surface flow volumes [-]                | -            | own model     | WaterGap       |
| Inclusion possibly extine species [-]   | Presence 1-4 | Presence 1-3  | -              |

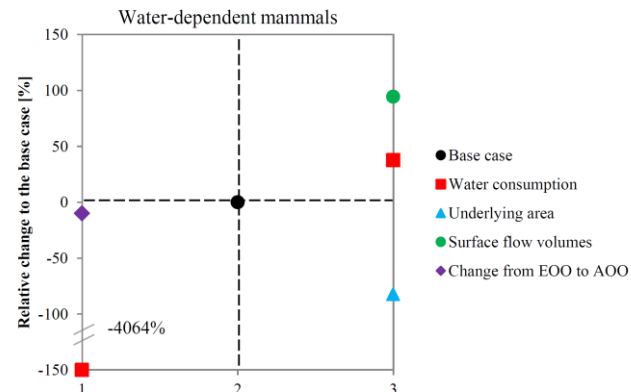

| parameter                               | 1   | 2 (base case) | 3              |
|-----------------------------------------|-----|---------------|----------------|
| Water consumption [m <sup>3</sup> /yr ] | 10  | 1000          | 1'000'000      |
| underlying area [ha]                    | -   | Ramsar area   | waterbody area |
| surface flow volumes [-]                | -   | own model     | WaterGap       |
| Change from EOO to AOO [-]              | AOO | EOO           | -              |

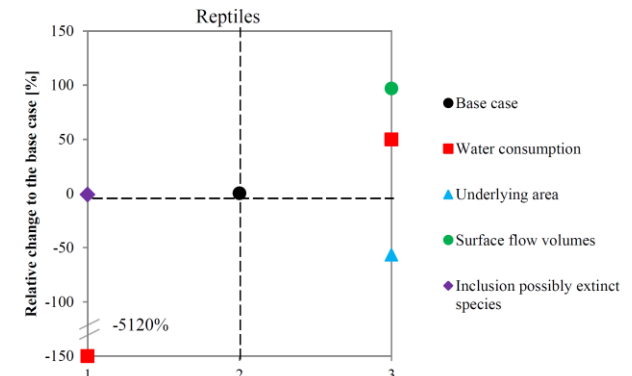

| parameter                               | 1            | 2 (base case) | 3              |
|-----------------------------------------|--------------|---------------|----------------|
| Water consumption [m <sup>3</sup> /yr ] | 10           | 1000          | 1'000'000      |
| underlying area [ha]                    | -            | Ramsar area   | waterbody area |
| surface flow volumes [-]                | -            | own model     | WaterGap       |
| Inclusion possibly extine species [-]   | Presence 1-4 | Presence 1-3  | -              |

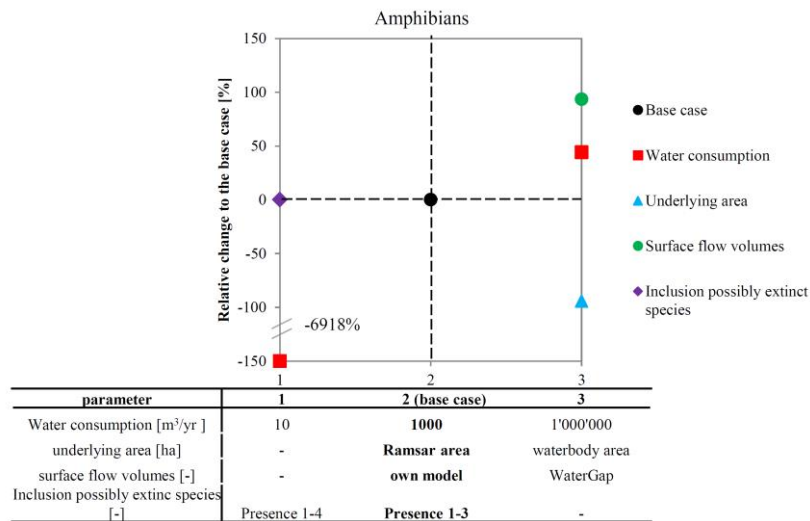

415  
416

Figure S39: Sensitivity analysis overview for SW-fed wetlands and all taxa separately. The change in each parameter is given for the global median values, parameters are listed below the graphic. Too large changes are indicated next to the marker.

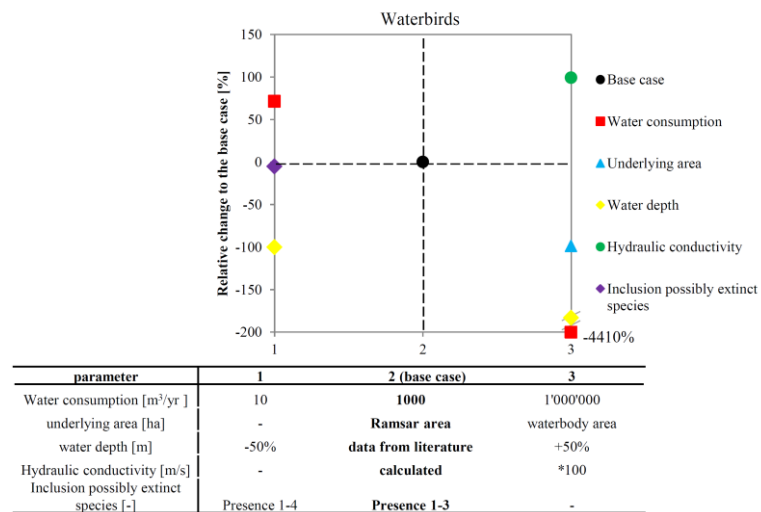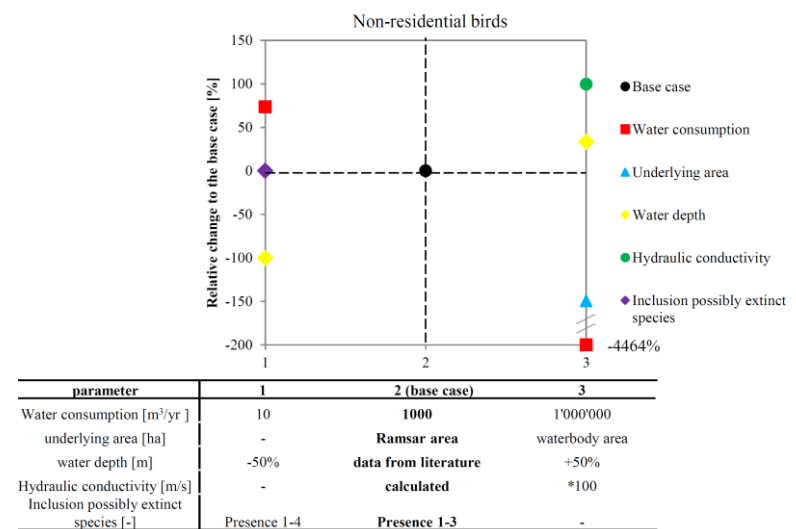

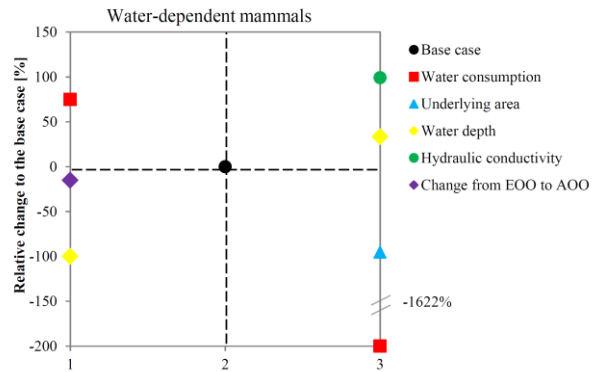

| parameter                               | 1    | 2 (base case)        | 3              |
|-----------------------------------------|------|----------------------|----------------|
| Water consumption [m <sup>3</sup> /yr ] | 10   | 1000                 | 1'000'000      |
| underlying area [ha]                    | -    | Ramsar area          | waterbody area |
| water depth [m]                         | -50% | data from literature | +50%           |
| Hydraulic conductivity [m/s]            | -    | calculated           | *100           |
| Change from EOO to AOO [-]              | AOO  | EOO                  | -              |

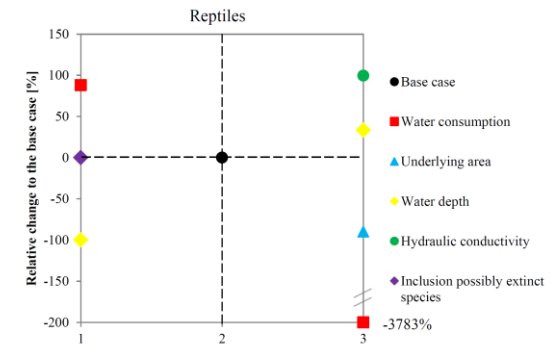

| parameter                               | 1            | 2 (base case)        | 3              |
|-----------------------------------------|--------------|----------------------|----------------|
| Water consumption [m <sup>3</sup> /yr ] | 10           | 1000                 | 1'000'000      |
| underlying area [ha]                    | -            | Ramsar area          | waterbody area |
| water depth [m]                         | -50%         | data from literature | +50%           |
| Hydraulic conductivity [m/s]            | -            | calculated           | *100           |
| Inclusion possibly extinct species [-]  | Presence 1-4 | Presence 1-3         | -              |

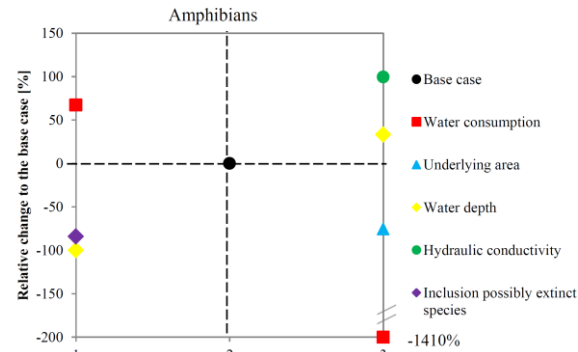

| parameter                               | 1            | 2 (base case)        | 3              |
|-----------------------------------------|--------------|----------------------|----------------|
| Water consumption [m <sup>3</sup> /yr ] | 10           | 1000                 | 1'000'000      |
| underlying area [ha]                    | -            | Ramsar area          | waterbody area |
| water depth [m]                         | -50%         | data from literature | +50%           |
| Hydraulic conductivity [m/s]            | -            | calculated           | *100           |
| Inclusion possibly extinct species [-]  | Presence 1-4 | Presence 1-3         | -              |

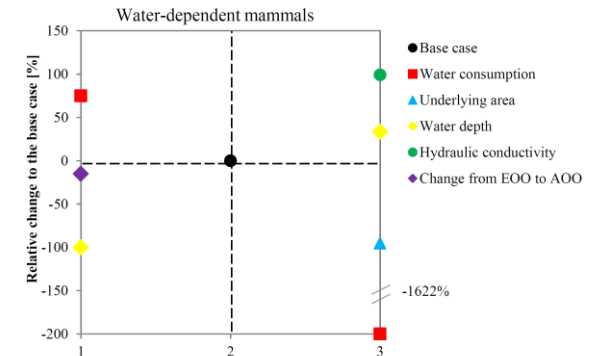

| parameter                               | 1            | 2 (base case)        | 3              |
|-----------------------------------------|--------------|----------------------|----------------|
| Water consumption [m <sup>3</sup> /yr ] | 10           | 1000                 | 1'000'000      |
| underlying area [ha]                    | -            | Ramsar area          | waterbody area |
| water depth [m]                         | -50%         | data from literature | +50%           |
| Hydraulic conductivity [m/s]            | -            | calculated           | *100           |
| Inclusion possibly extinct species [-]  | Presence 1-4 | Presence 1-3         | -              |

417 Figure S40: Sensitivity analysis overview for GW-fed wetlands and all taxa separately. The change in each parameter is given for the global median values, parameters are listed below  
 418 the graphic. Too large changes are indicated next to the marker.

419 **S12. Example of comparison of CFs calculated with PDFs and species-eq.**

420 The CF in PDF·yr/m<sup>3</sup> of the two SW-fed wetlands “Cheyenne Bottoms” (USA) and “Lake Ånnsjön”  
421 (Sweden) is the same ( $3.38 \cdot 10^{-9}$  PDF·yr/m<sup>3</sup>). However, the number of waterbird species present is  
422 very different, being 112 in “Cheyenne Bottoms” and 49 in “Lake Ånnsjön”. Absolute species loss  
423 was one order of magnitude smaller in the Swedish wetland. VS is the same order of magnitude in  
424 both wetlands ( $2.5 \cdot 10^{-6}$  for Cheyenne Bottoms and  $1.1 \cdot 10^{-6}$  for Lake Ånnsjön) and CpA one order of  
425 magnitude lower in “Cheyenne Bottoms”, showing that the wetland habitat loss risk is larger than in  
426 “Lake Ånnsjön”. CFs are consequently different for those two wetlands in the species-eq approach  
427 (CF for “Cheyenne Bottoms”  $1.83 \cdot 10^{-10}$  species-eq·yr/m<sup>3</sup>, for “Lake Ånnsjön”  $5.8 \cdot 10^{-12}$  species-  
428 eq·yr/m<sup>3</sup>).

429 **S13. Agricultural water requirement ratio**

430 The consumptive share of the water use can be used for estimating water consumption amounts from  
431 withdrawn water amounts (for agriculture). It is based on data from AQUASTAT<sup>19</sup> for 93 developing  
432 countries and on data from Döll and Siebert<sup>20</sup> for other world regions and is shown in Figure S41.

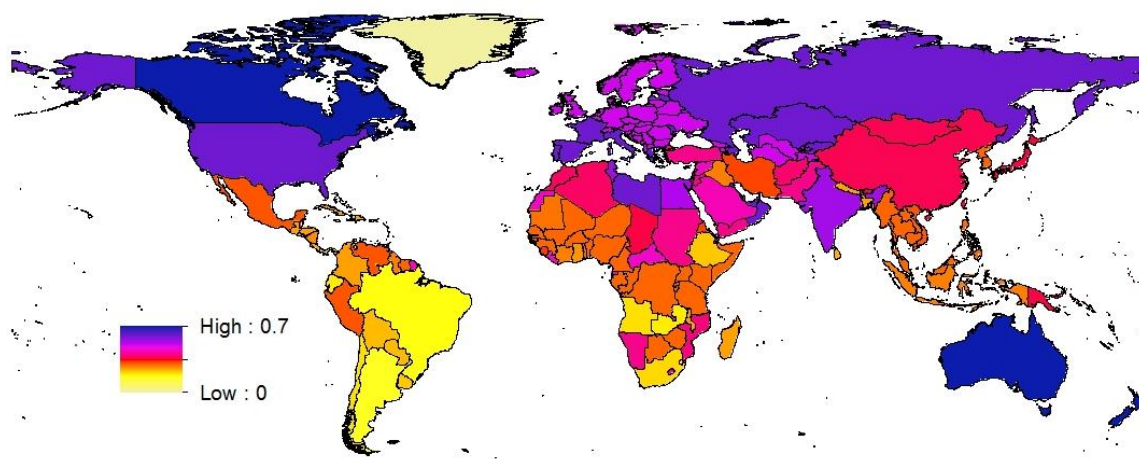

433  
434 **Figure S41: Water requirement ratios based on data from AQUASTAT<sup>19</sup> and Döll and Siebert (2002).<sup>20</sup> Base map**  
435 **with country boundaries adapted from ref.<sup>8</sup>**

436 **S14. References**

- 437 (1) Ramsar Convention. Convention on Wetlands of International Importance especially as Waterfowl Habitat.  
438 The Convention on Wetlands text, as amended in 1982 and 1987. Director, Office of International  
439 Standards and Legal Affairs; United Nations Educational, Scientific and Cultural Organization  
440 (UNESCO) 1994, Paris.
- 441 (2) Ramsar Sites Information Service. (accessed 16 May 2012); Available from:  
442 <http://ramsar.wetlands.org/Database/AbouttheRamsarSitesDatabase/tabid/812/Default.aspx>.
- 443 (3) BirdLife International; Nature Serve. Bird species distribution maps of the world, 2011, BirdLife  
444 International, Cambridge, UK and NatureServe, Arlington, USA.
- 445 (4) IUCN, (International Union for Conservation of Nature and Natural Resources). IUCN Red List of  
446 Threatened Species. Version 2012.1. (accessed 26 November 2012); Available from:  
447 <http://www.iucnredlist.org>.
- 448 (5) IUCN, (International Union for Conservation of Nature and Natural Resources). Spatial data for amphibians.  
449 (accessed 26 November 2012); Available from: [http://www.iucnredlist.org/technical-documents/spatial-  
450 data#amphibians](http://www.iucnredlist.org/technical-documents/spatial-data#amphibians).

- 451 (6) IUCN, (International Union for Conservation of Nature and Natural Resources). Spatial data for reptiles.  
 452 (accessed 26 November 2012); Available from: <http://www.iucnredlist.org/technical-documents/spatial->  
 453 [data#reptiles](http://www.iucnredlist.org/technical-documents/spatial-data#reptiles).
- 454 (7) Rondinini, C.;Di Marco, M.;Chiozza, F.;Santulli, G.;Baisero, D.;Visconti, P.;Hoffmann, M.;Schipper,  
 455 J.;Stuart, S.N.;Tognelli, M.F.;Amori, G.;Falcusci, A.;Maiorano, L.;Boitani, L. Global habitat  
 456 suitability models of terrestrial mammals. *Phil.Trans.R.Soc.B.* **2011**, 366: 2633-2641
- 457 (8) ESRI. ESRI Data&Maps. (accessed 14 December 2009); Available from:  
 458 <http://www.arcgis.com/home/group.html?owner=esri&title=ESRI%20Data%20%26%20Maps&content>  
 459 [=all&focus=maps](http://www.arcgis.com/home/group.html?owner=esri&title=ESRI%20Data%20%26%20Maps&content).
- 460 (9) Lehner, B.;Verdin, K.;Jarvis, A. New global hydrography derived from spaceborne elevation data. *Eos,*  
 461 *Transactions, AGU.* **2008**, 89(10): 93-94
- 462 (10) Lehner, B.;Döll, P. Development and validation of a global database of lakes, reservoirs and wetlands.  
 463 *Journal of Hydrology.* **2004**, 296(1-4): 1-22
- 464 (11) New, M.;Lister, D.;Hulme, M.;Makin, I. A high-resolution data set of surface climate over global land  
 465 areas. *Climate Research.* **2002**, 21(1): 1-25
- 466 (12) Trabucco, A.;Zomer, R. Global Potential Evapo-Transpiration (Global-PET) and Global Aridity Index  
 467 (Global-Aridity) Geo-Database. , CGIAR Consortium for Spatial Information, Editor **2009**, Available  
 468 online from the CGIAR-CSI GeoPortal at: <http://www.csi.cgiar.org>.
- 469 (13) Rosenzweig, M.*Species diversity in space and time*. Cambridge University Press: Cambridge, United  
 470 Kingdom, 1995.
- 471 (14) Drakare, S.;Lennon, J.;Hillebrand, H. The imprint of the geographical, evolutionary and ecological context  
 472 on species-area relationships. *Ecology Letters.* **2006**, 9: 215-227
- 473 (15) Dengler, J. Which function describes the species-area relationship best? A review and empirical evaluation.  
 474 *Journal of Biogeography.* **2009**, 36: 728-744
- 475 (16) Brooks, T.M.;Mittermeier, R.A.;Mittermerier, C.G.;da Fonseca, G.A.;Rylands, A.B.;Konstant, W.R.;Flick,  
 476 P.;Pilgrim, J.;Oldfield, S.;Magin, G.;Hilton-Taylor, C. Habitat Loss and Extinction in the Hotspots of  
 477 Biodiversity. *Conservation Biology.* **2002**, 16(4): 909-923
- 478 (17) Thomas, C.D.;Cameron, A.;Green, R.E.;Bakkenes, M.;Beaumont, L.J.;Collingham, Y.C.;Erasmus,  
 479 B.F.;Ferreira de Siqueira, M.;Grainger, A.;Hannah, L.;Hughes, L.;Huntley, B.;van Jaarsveld,  
 480 A.S.;Midgley, G.F.;Miles, L.;Ortega-Huerta, M.A.;Townsend Peterson, A.;Phillips, O.L.;Williams, S.E.  
 481 Extinction risk from climate change. *Nature.* **2004**, 427: 145-148
- 482 (18) Verones, F.;Pfister, S.;Hellweg, S. Quantifying area changes of internationally important wetlands due to  
 483 water consumption in LCA. *Environ. Sci. Technol.* **2013**: DOI:10.1021/es400266v
- 484 (19) FAO, (Food and Agriculture Organization of the United Nations). AQUSTAT - Review of agricultural  
 485 water use per country. (accessed 5 April 2012); Available from:  
 486 [http://www.fao.org/nr/water/aquastat/water\\_use\\_agr/index.stm](http://www.fao.org/nr/water/aquastat/water_use_agr/index.stm).
- 487 (20) Döll, P.;Siebert, S. Global Modelling of irrigation water requirements. *Water Resour. Res.* **2002**, 38(4):  
 488 1037

489

490
